# Supplementary material for: Attitudes of at-risk older adults about prevention of cardiovascular disease and dementia using eHealth: a qualitative study in a European context
Source: PubMed Central journal article supplement (PMC7412614; doi:10.1136/bmjopen-2020-037050), 2020-08-06
Supplement: bmjopen-2020-037050.draft_revisions.pdf [file bmjopen-2020-037050.draft_revisions.pdf]

# BMJ Open

BMJ Open is committed to open peer review. As part of this commitment we make the peer review history of every article we publish publicly available.

When an article is published we post the peer reviewers' comments and the authors' responses online. We also post the versions of the paper that were used during peer review. These are the versions that the peer review comments apply to.

The versions of the paper that follow are the versions that were submitted during the peer review process. They are not the versions of record or the final published versions. They should not be cited or distributed as the published version of this manuscript.

BMJ Open is an open access journal and the full, final, typeset and author-corrected version of record of the manuscript is available on our site with no access controls, subscription charges or pay-per-view fees (<http://bmjopen.bmj.com>).

If you have any questions on BMJ Open's open peer review process please email [info.bmjopen@bmj.com](mailto:info.bmjopen@bmj.com)

# BMJ Open

## Prevention of cardiovascular disease and dementia using eHealth: a qualitative study of attitudes of at-risk older adults in a European context

|                               |                                                                                                                                                                                                                                                                                                                                                                                                                                                                                                                                                                                                                                                                                                                                                                                                                                                                                                                                                                                                                                                                                                                                                                                                                                                                                                                                                                                                                                                                                                                                                  |
|-------------------------------|--------------------------------------------------------------------------------------------------------------------------------------------------------------------------------------------------------------------------------------------------------------------------------------------------------------------------------------------------------------------------------------------------------------------------------------------------------------------------------------------------------------------------------------------------------------------------------------------------------------------------------------------------------------------------------------------------------------------------------------------------------------------------------------------------------------------------------------------------------------------------------------------------------------------------------------------------------------------------------------------------------------------------------------------------------------------------------------------------------------------------------------------------------------------------------------------------------------------------------------------------------------------------------------------------------------------------------------------------------------------------------------------------------------------------------------------------------------------------------------------------------------------------------------------------|
| Journal:                      | <i>BMJ Open</i>                                                                                                                                                                                                                                                                                                                                                                                                                                                                                                                                                                                                                                                                                                                                                                                                                                                                                                                                                                                                                                                                                                                                                                                                                                                                                                                                                                                                                                                                                                                                  |
| Manuscript ID                 | bmjopen-2020-037050                                                                                                                                                                                                                                                                                                                                                                                                                                                                                                                                                                                                                                                                                                                                                                                                                                                                                                                                                                                                                                                                                                                                                                                                                                                                                                                                                                                                                                                                                                                              |
| Article Type:                 | Original research                                                                                                                                                                                                                                                                                                                                                                                                                                                                                                                                                                                                                                                                                                                                                                                                                                                                                                                                                                                                                                                                                                                                                                                                                                                                                                                                                                                                                                                                                                                                |
| Date Submitted by the Author: | 16-Jan-2020                                                                                                                                                                                                                                                                                                                                                                                                                                                                                                                                                                                                                                                                                                                                                                                                                                                                                                                                                                                                                                                                                                                                                                                                                                                                                                                                                                                                                                                                                                                                      |
| Complete List of Authors:     | <p>Akenine, Ulrika; Karolinska Institutet and Karolinska University Hospital, Division of Clinical Geriatrics , Department of Neurobiology, Care Sciences and Society<br/> Barbera, Mariagnese; University of Eastern Finland, Clinical Medicine/Neurology<br/> Beishuizen, Cathrien; Academic Medical Center, General Practice<br/> Fallah Pour, Mandana; Karolinska Institutet, Division of Occupational Therapy, Department of Neurobiology, Care Sciences and Society<br/> Guillemont, Juliette; University of Toulouse 111, INSERM<br/> Rosenberg, Anna; University of Eastern Finland, Clinical Medicine/Neurology<br/> Coley, Nicola; University of Toulouse, Epidemiology and public health<br/> Mangialasche, Francesca; Karolinska Institutet, Division of Geriatric Epidemiology<br/> Salo, Lotta; University of Eastern Finland School of Medicine, Institutet of Clinical Medicine<br/> Savy, Stephanie; University of Toulouse 111, INSERM<br/> Pols, A.; AMC, General Practice<br/> Andrieu , Sandrine; University of Toulouse 111, INSERM<br/> Richard, Edo; Academic Medical Center/University of Amsterdam, Department of Neurology; Radboud University Medical Center, Department of Neurology<br/> Soininen, Hilikka; Institute of Clinical Medicine - Neurology, University of Eastern Finland, Kuopio, Finland; Neurocenter Neurology, Kuopio University Hospital, Kuopio, Finland<br/> Moll van Charante, Eric; AMC, General Practice<br/> Kivipelto, Miia; Karolinska Institutet, Division of Geriatric Epidemiology</p> |
| Keywords:                     | Dementia < NEUROLOGY, PREVENTIVE MEDICINE, PUBLIC HEALTH                                                                                                                                                                                                                                                                                                                                                                                                                                                                                                                                                                                                                                                                                                                                                                                                                                                                                                                                                                                                                                                                                                                                                                                                                                                                                                                                                                                                                                                                                         |
|                               |                                                                                                                                                                                                                                                                                                                                                                                                                                                                                                                                                                                                                                                                                                                                                                                                                                                                                                                                                                                                                                                                                                                                                                                                                                                                                                                                                                                                                                                                                                                                                  |

SCHOLARONE™  
Manuscripts

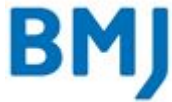

I, the Submitting Author has the right to grant and does grant on behalf of all authors of the Work (as defined in the below author licence), an exclusive licence and/or a non-exclusive licence for contributions from authors who are: i) UK Crown employees; ii) where BMJ has agreed a CC-BY licence shall apply, and/or iii) in accordance with the terms applicable for US Federal Government officers or employees acting as part of their official duties; on a worldwide, perpetual, irrevocable, royalty-free basis to BMJ Publishing Group Ltd ("BMJ") its licensees and where the relevant Journal is co-owned by BMJ to the co-owners of the Journal, to publish the Work in this journal and any other BMJ products and to exploit all rights, as set out in our [licence](#).

The Submitting Author accepts and understands that any supply made under these terms is made by BMJ to the Submitting Author unless you are acting as an employee on behalf of your employer or a postgraduate student of an affiliated institution which is paying any applicable article publishing charge ("APC") for Open Access articles. Where the Submitting Author wishes to make the Work available on an Open Access basis (and intends to pay the relevant APC), the terms of reuse of such Open Access shall be governed by a Creative Commons licence – details of these licences and which [Creative Commons](#) licence will apply to this Work are set out in our licence referred to above.

Other than as permitted in any relevant BMJ Author's Self Archiving Policies, I confirm this Work has not been accepted for publication elsewhere, is not being considered for publication elsewhere and does not duplicate material already published. I confirm all authors consent to publication of this Work and authorise the granting of this licence.

## Title page

# Prevention of cardiovascular disease and dementia using eHealth: a qualitative study of attitudes of at-risk older adults in a European context

## Running headline

Preventing cardiovascular disease and dementia using eHealth in older Europeans

## Authors

Ulrika Akenine<sup>1,12\*§</sup>, Mariagnese Barbera<sup>2\*</sup>, Cathrien RL Beishuizen<sup>3\*</sup>, Mandana Fallahpour<sup>1,4</sup>, Juliette Guillemont<sup>5</sup>, Anna Rosenberg<sup>2</sup>, Nicola Coley<sup>5,6</sup>, Francesca Mangialasche<sup>1,7</sup>, Lotta Salo<sup>2</sup>, Stéphanie Savy<sup>5</sup>, A Jeannette Pols<sup>8</sup>, Sandrine Andrieu<sup>5,6</sup>, Edo Richard<sup>9,10</sup>, Hilkka Soininen<sup>2,11</sup>, Eric Moll van Charante<sup>3</sup>, and Miia Kivipelto<sup>1,12-15</sup> for the HATICE study group\*\*.

\* These authors contributed equally to the study

\*\* Full list of the members of the HATICE study group can be found at the end of the manuscript

## Affiliations

1, Division of Clinical Geriatrics, Center for Alzheimer research, Department of Neurobiology, Care Sciences and Society, Karolinska Institutet, Stockholm, Sweden; 2, Department of Neurology, Institute of Clinical Medicine, University of Eastern Finland, Kuopio, Finland; 3, Department of General Practice, Amsterdam UMC/University of Amsterdam, Amsterdam, The Netherlands; 4, Division of Occupational Therapy, Department of Neurobiology, Care Sciences and Society, Karolinska Institutet, Stockholm, Sweden; 5, INSERM, University of Toulouse, Toulouse, France; 6, Department of Epidemiology and Public Health, Toulouse University Hospital, Toulouse, France; 7, Aging Research Center, Department of Neurobiology, Care Sciences and Society, Karolinska Institutet and Stockholm University, Stockholm, Sweden; 8,

1  
2  
3 Section of Medical Ethics, Department of General Practice, Amsterdam UMC/University of  
4  
5 Amsterdam, Amsterdam, The Netherlands; 9, Department of Neurology, Amsterdam  
6  
7 UMC/University of Amsterdam, Amsterdam, The Netherlands; 10, Department of Neurology,  
8  
9 Donders Institute for Brain, Cognition and Behaviour, Radboud University Medical Center,  
10  
11 Nijmegen, The Netherlands; 11, Neurocenter, Neurology, Kuopio University Hospital, Kuopio,  
12  
13 Finland; 12, Theme Aging, Karolinska University Hospital, Stockholm, Sweden 13, Stockholms  
14  
15 Sjukhem, R&D unit, Stockholm, Sweden; 14, Neuroepidemiology and Ageing Research Unit,  
16  
17 School of Public Health, Imperial College London, London, United Kingdom; 15, Institute of  
18  
19 Public Health and Clinical Nutrition, University of Eastern Finland, Kuopio, Finland.  
20  
21  
22

23  
24 **§Corresponding author:**

25  
26 Ulrika Akenine

27  
28 Karolinska Institutet, Department of Neurobiology, Care Sciences and Society, Division of Clinical  
29  
30 Geriatrics, Stockholm, Sweden

31  
32 Karolinska vägen 37A, QA32

33  
34 SE-171 64 Solna

35  
36 Sweden

37  
38 Tel: +46 70 667 99 67

39  
40 E-mail: [Ulrika.Akenine@ki.se](mailto:Ulrika.Akenine@ki.se)

41  
42  
43  
44  
45  
46  
47 Word count: 4036 (from introduction to conclusion)

48  
49  
50  
51 **Keywords:** Cardiovascular disease, dementia, eHealth, qualitative methods, prevention  
52  
53  
54  
55  
56  
57  
58  
59  
60

1  
2  
3 **Prevention of cardiovascular disease and dementia using eHealth: a qualitative study of**  
4 **attitudes of at-risk older adults in a European context**  
5  
6

7  
8 **ABSTRACT**  
9

10 **Objectives:** Prevention of cardiovascular disease (CVD) and dementia is a key health priority  
11 among older adults. Understanding individuals' knowledge of and attitudes towards the prevention  
12 of these conditions, particularly when delivered through novel eHealth tools, could help designing  
13 effective prevention programmes. To explore the knowledge of and attitudes towards prevention  
14 among older adults at increased risk of CVD and dementia, and to describe the facilitators and  
15 barriers for engagement in eHealth self-management prevention programmes.  
16  
17  
18  
19  
20  
21  
22  
23

24 **Design:** Qualitative research approach. Data were collected through eight focus groups in Finland,  
25 France, and the Netherlands. Data were analysed following the principles of grounded theory.  
26  
27  
28

29 **Setting and participants:** Forty-four community dwellers aged 65+ at risk of CVD were  
30 recruited from a previous trial cohort in Finland and through general practices in France and the  
31 Netherlands.  
32  
33  
34

35 **Results:** The study identified three categories: access to reliable information, trust in the  
36 healthcare providers and burden and stigma of dementia, and a core category: the interactive  
37 process of the three categories influencing engagement in self-management prevention  
38 programme. The categories were interconnected through an interactive process, and influenced by  
39 the local healthcare culture and context which shaped them differently, becoming either  
40 facilitators or barriers to engage in eHealth self-management prevention programmes.  
41  
42  
43  
44  
45  
46  
47  
48

49 **Conclusions:** The study emphasises the importance of considering the interactions between the  
50 identified categories in this study, grounded in the local healthcare culture and context in further  
51 developments of eHealth self-management interventions aiming to prevent CVD and dementia.  
52  
53  
54  
55

56 **Trial registration number: ISRCTN48151589; Pre-results**  
57  
58  
59  
60

1  
2  
3  
4  
5  
6  
7  
8  
9  
10  
11  
12  
13  
14  
15  
16  
17  
18  
19  
20  
21  
22  
23  
24  
25  
26  
27  
28  
29  
30  
31  
32  
33  
34  
35  
36  
37  
38  
39  
40  
41  
42  
43  
44  
45  
46  
47  
48  
49  
50  
51  
52  
53  
54  
55  
56  
57  
58  
59  
60

### **Strengths and limitations of the study**

- This qualitative study benefits from an international setting which facilitated capturing individuals' attitudes regarding prevention of dementia and CVD across the three countries on general level, but also the variations.
- Language barriers e.g., performing the data analysis in English was challenging. To increase the credibility, the analysis was extensively discussed within research group, both at a national and international level until agreement was reached.
- Eight sessions of focus groups were conducted with 48 participants in total in three countries ensuring the richness of the data for the data analysis

## INTRODUCTION

As the number of older adults increases worldwide, a rise in cardiovascular disease (CVD) and dementia cases has been reported,<sup>1,2</sup> causing health, economic and social burdens.<sup>3</sup> Prevention of CVD and dementia has been identified as a world-wide health priority.<sup>2,4,5</sup> Both CVD and dementia share several modifiable risk factors<sup>1,2,6</sup> – e.g. hypertension, hypercholesterolaemia, diabetes mellitus, obesity, smoking, physical inactivity, unhealthy diet - providing prevention opportunities.<sup>7-9</sup> Promising novel prevention strategies include eHealth for its ease of access and use.<sup>10,11</sup> However, engaging the general population with eHealth might be challenging,<sup>12</sup> and more insight is needed on how to maximise its advantages among older adults.

Successful prevention programmes are based on factors such as the selection of appropriate target populations, the implementation of optimal interventions, and using suitable delivery modalities.<sup>13,</sup>

<sup>14</sup> Furthermore, engagement<sup>15</sup> and health literacy, the ability to make sound decisions concerning health among the target population,<sup>16</sup> are crucial for the success of any public health intervention.

Although risk factors have been identified, little is known about older adults' knowledge regarding the prevention of CVD and dementia, and their attitudes towards prevention initiatives including eHealth. The design of prevention programmes tailored to this age group is therefore particularly challenging, and preventive trials among older adults are relatively scarce.<sup>17</sup> Such knowledge would be important for designing more effective preventive programmes and facilitating individuals' engagement.

The factors influencing engagement in prevention programmes have been partially investigated using qualitative approaches.<sup>18-20</sup> Previous studies suggested that a positive attitude of the participant is essential to implement effective preventive care,<sup>18</sup> which in turn promotes healthy cognitive ageing.<sup>19</sup> However, it is unclear how it can be supported. A personal relationship between the healthcare provider and the patient seems to be beneficial,<sup>20</sup> but more evidence is needed on how to best encourage lifestyle self-management. In addition, the previous literature



1  
2  
3 has not simultaneously considered both CVD and dementia, and international studies are still  
4  
5 scarce. Factors related to the country-specific context might considerably impact people's  
6  
7 perception of prevention;<sup>21</sup> For example, accessing novel tools for healthcare can be perceived as a  
8  
9 challenge, especially in areas where new technologies are not well established.<sup>10</sup>  
10  
11

12 The present study is part of the Healthy Aging Through Internet Counselling in the Elderly  
13  
14 (HATICE) project,<sup>22</sup> which tested the efficacy of an eHealth multidomain intervention <sup>23</sup> to  
15  
16 improve older adults' management of risk factors for CVD and dementia, in a randomised  
17  
18 controlled trial (RCT), carried out in Finland, France, and the Netherlands. The aim of this sub-  
19  
20 study was to explore the knowledge of and attitudes towards the prevention of CVD and dementia  
21  
22 among older adults at risk of these conditions and describe the facilitators and barriers for  
23  
24 engagement in eHealth self-management prevention programmes.  
25  
26  
27  
28  
29  
30

## 31 **METHODS**

### 32 **Design**

33  
34 The study applied a qualitative research approach following the principles of grounded theory,<sup>24</sup>  
35  
36 and was structured in sequential steps of data collection performed in three rounds of focus groups  
37  
38 and analyses (figure 1). The HATICE research team<sup>25</sup> had expertise in qualitative, clinical and  
39  
40 basic science research, ensuring an international perspective and a thorough understanding of the  
41  
42 local healthcare settings.  
43  
44  
45

46  
47 The study was conducted following the consolidated criteria for reporting qualitative research  
48  
49 (COREQ).<sup>26</sup>  
50  
51

### 52 **Participants and setting**

53  
54 Forty-four older adults at risk of CVD were purposively recruited from a previous trial cohort<sup>7</sup>  
55  
56 (Finland) and through general practices (France, the Netherlands) (Table 1). The same recruitment  
57  
58  
59  
60

1  
2  
3 criteria used in the HATICE trial were applied:<sup>22</sup> age 65+, presence of CVD risk factors or history  
4 of CVD, and basic Internet literacy (use of email).  
5  
6

7  
8 The HATICE study was approved by the medical ethics committee of the Academic Medical  
9 Center (Netherlands), the Comité de Protection des Personnes Sud Ouest et Outre Mer (France),  
10 and the Northern Savo Hospital District Research Ethics Committee (Finland). For the present  
11 sub-study, no separate approval was required in Finland and France; in the Netherlands, approval  
12 was obtained from the medical ethics committee of the Academic Medical Centre.  
13  
14  
15  
16  
17  
18  
19  
20  
21

### 22 **Data collection**

23  
24 Eight focus group sessions structured in three rounds (figure 1) were conducted between October  
25 2013 and September 2015 following a pre-defined topic list (Table 2): three sessions in Finland,  
26 three in the Netherlands and two in France. Two members of each local research team were  
27 present at each session (average duration two hours): an experienced moderator in qualitative  
28 research and an assistant to take notes. The meetings were tape-recorded and transcribed verbatim,  
29 except for the first meeting in Finland and the second in France, due to technical issues where the  
30 detailed notes were analysed. The participants were allowed to freely develop the discussion.  
31  
32  
33  
34  
35  
36  
37  
38  
39  
40  
41  
42

### 43 **Data analysis**

44  
45 The data were analysed following the principles of grounded theory.<sup>24</sup> In each country, two  
46 researchers independently identified codes, combined and compared them in the axial-coding  
47 phase, created the categories, which were confirmed through consensus. The analyses were  
48 therefore performed in the local language, except in Finland, where neither of the researchers were  
49 native speakers. The transcripts and notes were first translated into English and independently  
50 cross-checked by two team members, both Finnish native- and English fluent-speakers. After  
51 completing the analyses of the first six sessions in each country, the findings were combined in  
52  
53  
54  
55  
56  
57  
58  
59  
60

1  
2  
3 English, and further discussed and compared by the full team in a face-to-face meeting. To ensure  
4 that the results were grounded in the data and focused on interactions between the categories, the  
5 analyses formed an iterative process, transitioning from the original data to the categories. The  
6  
7  
8  
9  
10 topics 'prevention in general', 'prevention of CVD' and 'prevention of dementia' and 'people's  
11  
12 perspectives on eHealth programmes for prevention were deemed not fully saturated. The original  
13  
14 data were further explored, and a third round of focus groups was organised in the Netherlands  
15  
16 and in Finland, using an adapted topic list (Table 2). This led to a better understanding of the  
17  
18 topics. A summary of the conclusions of the third focus group was returned to the participants for  
19  
20 trustworthiness of the data.  
21  
22  
23  
24  
25

### 26 **Patient and public involvement**

27  
28 Patients were not involved in this study. However, the participants were older adults at risk of  
29  
30 CVD and dementia who were directly involved in the development of HATICE eHealth  
31  
32 application by taking part in focus groups in this sub-study.  
33  
34  
35

## 36 **RESULTS**

37  
38 Three categories were identified, and a core category was developed, representing participants'  
39  
40 knowledge of and attitudes towards prevention, as well as the facilitators and barriers to engage in  
41  
42 eHealth self-management prevention programmes (See Table 3).  
43  
44  
45  
46  
47  
48

### 49 **Access to reliable information about CVD and dementia**

50  
51 Participants experienced confusion regarding the general meaning of prevention, and in particular  
52  
53 prevention of CVD and dementia. Prevention was generally described as acting to avoid a certain  
54  
55 disease, but when discussing how prevention should be put into practice, participants focused  
56  
57 mostly on how to identify symptoms and when to initiate a treatment. Unawareness of the right  
58  
59  
60

1  
2  
3 time to act was described as the main barrier to engage in prevention. Participants could name risk  
4 factors for CVD and dementia, but they could not concretely explain how to manage them.

5  
6  
7  
8 *“It is important to recognise the symptoms [...]. For example chest pain. [...] Make sure you visit*  
9 *the doctor in time and know what you should be alert of.” (fg1, Dutch participant)*

10  
11  
12 (fg = focus group)

13  
14  
15  
16  
17 In all three countries, participants expressed a need for reliable information about CVD and  
18 dementia, and on how to put general recommendations into practice. Access to reliable  
19 information was regarded as essential to empower them towards prevention, and their lack of  
20 information was regarded as essential to empower them towards prevention, and their lack of  
21 knowledge about these diagnoses represented a significant barrier to take action. They described  
22 reliable information as comprehensive information that is easy to understand, tailored to each  
23 individual situation and provided by a trustworthy source.

24  
25  
26  
27  
28  
29  
30  
31 *“[We need] a reference [...], a website with a search engine, information on diseases, up to date,*  
32 *specific”. (fg1, French participant)*

33  
34  
35  
36  
37 Not being able to distinguish trustworthy from untrustworthy sources was identified as another  
38 barrier. This was especially true for health-related information received from the Internet. The  
39 participants stressed that an eHealth platform, including support from a caregiver, can provide  
40 trustworthy information by authorised sources, tailored to individual needs.

41  
42  
43  
44  
45  
46  
47 *“Young people surf and search much more on the Internet than elderly. Elderly have much more*  
48 *difficulty to judge what information is of good quality and what isn't.” (fg1, Dutch participant)*

## 51 52 **Trust in the healthcare provider**

53  
54 The participants described that trust in their primary healthcare providers, e.g., general  
55 practitioners (GPs) and nurses, as well as trust in the received health-related information and the  
56 healthcare system, is a prerequisite to engage in prevention programmes. Some participants  
57  
58  
59  
60

1  
2  
3 mentioned that in order to provide the best possible medical advice, healthcare providers need to  
4 know their patients personally.  
5  
6

7 The participants referred to trust in different ways. Participants in France and the Netherlands  
8 highlighted the importance of having a good relationship with their primary healthcare providers,  
9 being one of the most important motivators to engage in prevention programmes including those  
10 delivered through eHealth tools. In fact, when discussing the HATICE platform, the Dutch and  
11 French participants expressed concerns regarding the interference with the regular healthcare  
12 provider who, to ensure continuity of care, expressed a strong preference for an eHealth  
13 prevention programme managed by their own primary healthcare provider.  
14  
15  
16  
17  
18  
19  
20  
21  
22

23  
24 *“You would prefer to go to your own GP who knows you already since so many years, rather*  
25 *than commit to someone you do not know.” (fg3, Dutch participant)*  
26  
27  
28  
29

30 Although the Finnish participants did not stress this aspect, they acknowledged the role of trust in  
31 the eHealth lifestyle coach and data integrity when managing personal information as encouraging  
32 factors to actively participate in such eHealth prevention programmes.  
33  
34  
35  
36

37 *“Trust and expertise [are the most important qualities]” (fg1, Finnish participant)*  
38  
39

40 While Dutch and French participants strongly relied on their GPs and took their advice seriously,  
41 Finnish participants described themselves as more independent and critical towards medical  
42 advice. The Finnish participants stressed the importance of their autonomy and own responsibility  
43 for their health and prevention, expressing their pronounced interest in health self-management.  
44  
45  
46  
47  
48  
49

50  
51 *“If your doctor prescribes medication you take it. After all, he has your best interest at heart.*  
52 *Even if you don't want to take them.” (fg3, Dutch participant)*  
53  
54  
55

56 *“[Prevention is the] patient's responsibility for him/herself.” (fg1, Finnish participant)*  
57  
58

## 59 **Burden and stigma of dementia**

60

1  
2  
3 The participants compared the possibilities for prevention of CVD with those of dementia. They  
4 described CVD as having good treatment options and a possibility to recover, whereas dementia as  
5 a condition with no possibility for recovery. Participants associated feelings of fear, shame and  
6 hopelessness in anticipation of developing dementia.  
7  
8  
9  
10  
11

12 *“You cannot reverse dementia, and from a cerebral infarction or heart infarction you can still*  
13 *recover.” (fg3, Dutch participant)*  
14  
15  
16  
17  
18

19 The participants described that these feelings, in addition to the lack of an effective treatment,  
20 renders dementia to be regarded as a great burden, almost as a “death sentence”. They described  
21 that the burden was caused by the loss of one’s independence, due to deterioration of cognitive  
22 skills, loss of physical capabilities, and loss of social relationships. Dementia was also regarded as  
23 a burden for the families, relatives and social relations of persons with dementia, and society.  
24  
25  
26  
27  
28  
29  
30  
31  
32

33 *“You see people with Alzheimer’s disease [...], you say let’s hope my life won’t end like that, like a*  
34 *vegetable.” (fg1, French participant)*  
35  
36

37 *“[Dementia requires [providing care by relatives and institutional care. It’s an expensive disease*  
38 *[...]. We do have a heavy burden to bear.” (fg3, Finnish participant)*  
39  
40  
41  
42  
43  
44

45 Participants generally expressed a pessimistic attitude towards prevention of dementia as opposed  
46 to CVD. However, being physically, mentally and socially active was described as a potential  
47 preventive factor.  
48  
49  
50  
51  
52  
53

54 *“If you are using your brain, then, it has to do with, uh, postponing it.” (fg3, Dutch participant)*  
55  
56  
57  
58  
59  
60

1  
2  
3 Fear was described by the participants as an encouraging factor to engage more in the prevention  
4 of dementia than of CVD.  
5  
6

7  
8 The fact that dementia shares many risk factors with CVD was not generally known and expressed  
9 by the participants. Concerning dementia, the Finnish participants' main concern was identifying  
10 the first symptoms and the right time to seek medical advice.  
11  
12  
13

14  
15  
16  
17  
18 *“There should be information on when I should go to a doctor for tests. People always say that*  
19 *you should go on time, but I don't know when is on time.” (fg1, Finnish participant)*  
20  
21  
22

23  
24 Nonetheless, the key role of genetics that they attributed to dementia was closely linked to their  
25 scepticism towards its prevention.  
26  
27  
28

29  
30  
31 *“It's a matter of wait and see. You can try to take preventive measures, but you cannot stop it*  
32 *[Dementia]. If you are born to get dementia, you will get it eventually. You can take medications*  
33 *etc., then you can maybe delay the onset of the disease, but eventually it will catch you.” (fg1,*  
34 *Dutch participant)*  
35  
36  
37  
38  
39  
40  
41  
42

43 Taken together, dementia seems to be associated with stigma. This stigma represented a barrier to  
44 obtaining reliable information for the Finnish participants, who stated that the fear of dementia  
45 made it more difficult to talk about it compared to CVD, and to consult a doctor about it.  
46  
47  
48  
49  
50  
51

52 *“The fear can make you freeze and cause you to not be able to talk. Just wondering about it in*  
53 *your mind, not putting it into words.” (fg3, Finnish participant)*  
54  
55  
56  
57  
58  
59  
60

## **The interactive process of three identified categories influencing engagement in self-management prevention programme**

From the three categories, a core category was developed: the interactive process of the three identified categories influencing engagement in self-management prevention programme. The three categories were interconnected through an interactive process and were strongly influenced by the local healthcare culture and context which shaped them differently (See figure 2). In order to minimise the stigma, there is a need to receive relevant reliable information and to trust in healthcare providers. However, the burden and stigma of dementia was described as a barrier to receiving reliable information and trusting healthcare providers. The participants described that fear of dementia made it difficult to talk about it (e.g., to a doctor), which in turn reinforced their perception of insufficient reliable information about the disease, which made it more frightening and unsafe. It was also described that this fear was experienced more strongly for dementia compared to CVD. On the other hand, participants mentioned that fear of dementia can improve their motivation to engage in dementia prevention programmes.

*“I realised when another person got sick, I woke up then 10 years ago when my mother was diagnosed with Alzheimer and I panicked and realised that I must do something.” (fg3, Finnish participant)*

The analyses also demonstrated that the category of burden and stigma of dementia was also interconnected with the category of trust in healthcare providers; only if participants could trust the source of information, they were likely to take action for their engagement in a prevention programme. The participants in all three countries described how the local healthcare system and context influenced their experiences in obtaining reliable health information, trust, and also burden and stigma of dementia. For example, Finnish participants experienced a sense of responsibility for their health and disease prevention. They described their interest in health self-management



1  
2  
3 related to specific diseases. Whereas, French and Dutch participants focused on the overall health  
4 status. The Finnish participants mostly highlighted the importance of trusting the source of  
5 information and the possibility of obtaining information independently. Dutch and French  
6 participants emphasised the importance of a trustworthy relationship with healthcare providers  
7 (e.g., GPs and nurses), which led them to trust the information received. Personal responsibility  
8 for their health (e.g., receiving reliable information about prevention of CVD and dementia) was  
9 important for the Finnish participants; they described that they were habituated to independently  
10 make medical decisions, and critically question medical recommendations. In contrast, the French  
11 and Dutch participants relied more on the advice provided by their healthcare providers without  
12 questioning them. The importance and benefits of dementia prevention were more clearly  
13 acknowledged by the Finnish participants; Dutch participants believed more in luck and chance  
14 regarding disease prevention.

15  
16  
17  
18  
19  
20  
21  
22  
23  
24  
25  
26  
27  
28  
29  
30  
31 *“We bicycled a lot and we liked / enjoyed doing that. But nevertheless, you can get the most*  
32 *horrible things. At the end of the day you have no influence on it.” (fg3, Dutch participant)*

## 33 34 35 36 37 38 **DISCUSSION**

39  
40  
41 In this European qualitative study, the aim was to explore the knowledge and attitudes towards  
42 prevention among older adults at increased risk of CVD and dementia. Three categories were  
43 identified; *access to reliable information*, *trust in healthcare providers*, and *burden and stigma of*  
44 *dementia*. Additionally, a core category was developed: *the interactive process of the three*  
45 *identified categories influencing engagement in self-management prevention programmes*. The  
46 three categories were interconnected through an interactive process and influenced by the local  
47 healthcare culture and context which shaped them differently, becoming either facilitators or  
48 barriers to engage in eHealth self-management prevention programmes. This process suggests a  
49 need for having access to reliable information about prevention of CVD and dementia. This was  
50  
51  
52  
53  
54  
55  
56  
57  
58  
59  
60

1  
2  
3 regarded as an opportunity for eHealth programmes to fulfil this need. However, in order to  
4  
5 translate this information into knowledge and to use it to take action towards engaging in  
6  
7 prevention programmes, individuals need to trust the information provided and have a relationship  
8  
9 of trust with their healthcare provider. The eHealth programmes might therefore include support  
10  
11 from people's own healthcare providers, or from online health coaches. Especially for dementia,  
12  
13 trust in the healthcare provider, access to reliable information and the generated knowledge could  
14  
15 support individuals and decrease their experience of dementia-related stigma and burden. This can  
16  
17 encourage individuals to take action towards engaging in prevention programmes (see figure 2).  
18  
19  
20  
21  
22

23  
24 Access to reliable information was identified as a key prerequisite for individuals' engagement in  
25  
26 prevention programmes. The Internet, however, was perceived as a confusing source of health-  
27  
28 related information. The findings stress the importance of implementing prevention programmes,  
29  
30 such as eHealth self-management programmes (e.g., HATICE), administered by trustworthy  
31  
32 organisations to provide reliable information about prevention. Previous research found  
33  
34 information from the Internet and media as a facilitator stimulating engagement in preventive care  
35  
36 from the perspective of healthcare providers (e.g. GPs).<sup>18</sup>  
37  
38  
39  
40  
41

42  
43 The findings stress that trust in healthcare providers, the source of information, and the healthcare  
44  
45 system are crucial facilitating factors. The lack of trust might hinder individuals from contacting  
46  
47 their healthcare provider, following recommendations / information received, and meaningfully  
48  
49 translating them into practice. The participants expressed that they have limited knowledge  
50  
51 regarding concrete methods to prevent CVD and dementia. Although dementia has been identified  
52  
53 as a key public health priority world-wide,<sup>27</sup> knowledge about it and its risk factors is limited in  
54  
55 the general population.<sup>28</sup> Based on our results, the lack of knowledge about dementia might lead to  
56  
57 fear, which hinders individuals from seeking help from the healthcare system and accessing the  
58  
59  
60

1  
2  
3 available opportunities for prevention, as well as a stigma, which might mirror the general attitude  
4  
5 of the society.<sup>29</sup> Interestingly, the burden and stigma of dementia was identified both as a  
6  
7 facilitator and a barrier for engagement in prevention. It can be assumed as a factor that might  
8  
9 hinder individuals from contacting healthcare providers and receiving thorough information  
10  
11 regarding the disease, including the current evidence on beneficial preventive interventions. It can  
12  
13 also motivate them to engage in prevention and to take action. According to the literature, the  
14  
15 concept of stigma, defined as “having some form of mark or sign that denotes disgrace or  
16  
17 discredit”.<sup>29</sup> When discussing prevention, prognosis, and treatment of dementia, in contrast to  
18  
19 CVD, the participants had a rather “white-and-black” perspective, which is in line with the  
20  
21 previous literature,<sup>30</sup> describing a belief that “nothing can be done”, which impacts individuals’  
22  
23 well-being. However, despite their pessimistic attitude regarding dementia prevention, the  
24  
25 participants described how their fear of the disease was experienced as a factor encouraging them  
26  
27 to actively engage in prevention programmes for dementia, compared to CVD, by being  
28  
29 physically, mentally and socially active. Our findings regarding the dynamic interactions between  
30  
31 the identified categories is supported by the previous literature, which highlighted the importance  
32  
33 of education and information in reducing the fear and stigma associated with dementia.<sup>30</sup>  
34  
35 Furthermore, they confirm previous findings on the urgent need, across all levels of society, for  
36  
37 increased awareness and understanding of dementia (diagnosis, symptoms, treatment, risk factors  
38  
39 and prevention), to improve quality of life among older adults.<sup>27, 28</sup>

40  
41  
42  
43  
44  
45  
46  
47  
48  
49 The results highlight not only the similar attitudes about prevention of dementia and CVD across  
50  
51 the three countries, which emerged as the three categories on a general level, but also the  
52  
53 differences grounded in the cultural and contextual backgrounds that shape the local healthcare  
54  
55 culture and context in these three countries. Culture is defined as the beliefs, perceptions, values,  
56  
57 norms, customs, and behaviours that are shared by a group or society and are passed from one  
58  
59  
60

1  
2  
3 generation to the next through both formal and informal education.<sup>31</sup> In this study, context is  
4 intended as “social environment”, that is the pool of structures and social systems through which  
5 society is organised (e.g. the healthcare system).<sup>32</sup> Engaging participants is key to successful  
6 preventive programmes. Although previous studies<sup>18-20</sup> investigated the motivating factors to  
7 engage older adults, none of these studies had an international design. This study emphasises how  
8 the local healthcare culture and context might affect individuals’ needs and access to information,  
9 their trust in healthcare providers and their perceived dementia-related stigma and burden, which  
10 represents their attitudes regarding prevention. Previous research highlights how context and  
11 culture can influence manifestations of dementia.<sup>33</sup> It also stresses the importance of culture and  
12 context in shaping several aspects of caregiving, as well as public policies, to improve the  
13 awareness and understanding of dementia.<sup>34</sup> In this respect, one important difference identified in  
14 the study among the participants was that the Finnish participants were more independent and self-  
15 responsible when making health-related decisions, whereas the Dutch and French participants  
16 relied more on their healthcare providers. These differences were also identified in a recent  
17 qualitative study conducted with Finnish and Dutch nurses about optimally supporting patients in  
18 CVD preventive care.<sup>35</sup> This may be due to differences in the three healthcare-systems based on a  
19 more stable doctor-patient relationship in France and The Netherlands, as opposed to Finland,  
20 where a patient is not registered with a specific GP. Furthermore, Finland has a long history of  
21 intensive preventive programmes targeting CVD,<sup>36</sup> which made the concept of prevention well  
22 assimilated within society. Finally, the Finnish participants were recruited within a previous  
23 preventive trial cohort.<sup>7</sup> Healthcare-related differences among the three countries were considered  
24 in the HATICE intervention design,<sup>37</sup> and these results confirm that context diversity should be  
25 considered when planning prevention programmes. Further studies are required to identify the  
26 most effective preventive strategies across cultures.  
27  
28  
29  
30  
31  
32  
33  
34  
35  
36  
37  
38  
39  
40  
41  
42  
43  
44  
45  
46  
47  
48  
49  
50  
51  
52  
53  
54  
55  
56  
57  
58  
59  
60

### ***Methodological considerations***

Although the study was conducted in small sections of each country's populations, these are representative samples of their respective areas, ensuring a fully international setting. Data collection in three different languages was challenging, as the translations into English might have influenced the results, and some of the nuances could have been lost in translation. However, interview guides were prepared with great care, including language-related issues. The findings were extensively discussed within the teams, both at a national and international level. Moreover, the total number of focus groups conducted and the broad areas of expertise of the research team were a significant asset. Additionally, frequent feedback from all team members was instrumental for the good execution of the study and the mutual understanding of the local settings. Differences in recruitment, such as the older age of the Dutch participants in the third round of focus groups and the enrolment of the Finnish participants from a previous preventive trial cohort<sup>7</sup> might have also affected our findings.

### ***Conclusions***

The study identified three categories and a core category. The categories were interconnected through an interactive process and influenced by the local healthcare culture and context which shaped them differently, either as facilitators or barriers to engage in eHealth self-management prevention programs. The findings can be integrated in future developments of eHealth self-management interventions to prevent modifiable risk factors for CVD and dementia. eHealth self-management programmes can fulfil the need for reliable and trustworthy health information. If a safe and trustworthy online environment can be developed, this may enhance engagement in prevention programmes and stimulate de-stigmatisation of dementia. The findings highlight the importance of taking the local healthcare context and culture into account when planning international prevention programmes. Studies on the perception of prevention and lifestyle

1  
2  
3 changes during and after clinical trials among individuals at risk for / at an early stage of cognitive  
4  
5 impairment can provide further insights.  
6  
7

## 8 **Acknowledgments**

9  
10  
11 The authors thank all the study participants, Carin Miedema and Suzanne Ligthart, for their  
12  
13 assistance in organisation and moderation of the Dutch focus groups; Floor Rooskens and Tessa  
14  
15 van Middelaar for the assistance in coding and analysis of the Dutch transcripts; and Shireen Sindi  
16  
17 for the language edition.  
18  
19

## 20 **Contributors**

21  
22  
23 Obtained funding: MK, ER, EMvC, HS, SA; Study design: UA, CRLB, MB, EMvC, FM, ER, HS,  
24  
25 SA, MK, JP, JG, NC, SS. Data collection: CRLB, MB, AR, LS, JG, NC, SS. Data analysis: UA,  
26  
27 CRLB, MB, EMvC, JG, SS. Interpretation of the results: UA, MF, MB, CRLB, EMvC, AR, FM,  
28  
29 NC, JP. Drafting of the manuscript: UA, MF, MB. The manuscript has been approved by all the  
30  
31 authors.  
32  
33  
34  
35

## 36 **Funding**

37  
38  
39 The research leading to these results has received funding from the European Union Seventh  
40  
41 Framework Programme (FP7/2007-2013) under grant agreement n° 305374. The study has also  
42  
43 been funded by the Joint Programme Neurodegenerative Disease” (JPND) “Multimodal  
44  
45 preventive trials for Alzheimer’s Disease: towards multinational strategies-programme: MIND-  
46  
47 AD”, Academy of Finland (291803) and VTR, Kuopio University Hospital (5772815), Swedish  
48  
49 Research Council (529-2014-7503), The Stockholms Sjukhem foundation, The Netherlands  
50  
51 Organisation for Health Research and Development, (733051041), and The French National  
52  
53 Research Agency (ANR-14-JPPS-0001-02).  
54  
55  
56  
57  
58

59 **Competing interests:** The authors declare that they have no conflict of interest.  
60

1  
2  
3 **Patient consent for publication:** All participants gave written and oral informed consent.  
4  
5

6 **Ethical approval:** The HATICE study was approved by the medical ethics committee of the  
7  
8 Academic Medical Center in the Netherlands, the Comité de Protection des Personnes Sud Ouest  
9  
10 et Outre Mer in France, and the Northern Savo Hospital District Research Ethics Committee in  
11  
12 Finland. For the present ancillary study, no separate approval was required in Finland and France;  
13  
14 in the Netherlands, approval was required and obtained from the medical ethics committee of the  
15  
16 Academic Medical Centre.  
17  
18

19  
20  
21 **Provenance and peer review:** Not commissioned; externally peer reviewed.  
22  
23

24 **Data sharing statement:** Data will not be made publicly available. Please contact the  
25  
26 corresponding author for more information.  
27  
28

29 **Open access:** This is an open access article distributed in accordance with the Creative Commons  
30  
31 Attribution Non Commercial (CC BY-NC 4.0) license, which permits others to copy, distribute,  
32  
33 remix, adapt, build upon this work non-commercially, and license their derivative works on  
34  
35 different terms, provided the original work is properly cited, appropriate credit is given, any  
36  
37 changes made indicated, and the use is non-commercial. See:  
38  
39 <http://creativecommons.org/licenses/by-nc/4.0/>.  
40  
41  
42  
43

44 **Full list of the members of the HATICE study group:**  
45

46  
47 Sandrine Andrieu, Mariagnese Barbera, Cathrien Beishuizen, Carol Brayne, Nicola Coley, Juliette  
48  
49 Guillemont, Marieke Hoevenaar-Blom, Susan Jongstra, Miia Kivipelto, Francesca Mangialasche,  
50  
51 Yannick Meiller, Eric P Moll van Charante, Tiia Ngandu, Edo Richard, Hilikka Soininen, Bram  
52  
53 van de Groep, Willem A van Gool, Tessa van Middelaar, Lennard van Wanrooij.  
54  
55  
56  
57  
58  
59  
60

## References

1. Alzheimer's Disease International. World Alzheimer report 2015. The global impact of dementia: An analysis of prevalence, incidence, cost and trend 2015; Available from: <https://www.alz.co.uk/research/WorldAlzheimerReport2015.pdf>.
2. Writing Group M, *et al*. Executive Summary: Heart Disease and Stroke Statistics--2016 Update: A Report From the American Heart Association. *Circulation* 2016; 133: 447-54.
3. Winblad B, *et al*. Defeating Alzheimer's disease and other dementias: a priority for European science and society. *Lancet Neurol* 2016; 15: 455-532.
4. Shah H, *et al*. Research priorities to reduce the global burden of dementia by 2025. *Lancet Neurol* 2016; 15: 1285-1294.
5. Smith AD, Mangialasche F, Kivipelto M. Dementia research priorities-2. *Lancet Neurol* 2017; 16:181-182.
6. Solomon A, *et al*. Advances in the prevention of Alzheimer's disease and dementia. *J Intern Med* 2014; 275: 229-50.
7. Ngandu T, *et al*. A 2 year multidomain intervention of diet, exercise, cognitive training, and vascular risk monitoring versus control to prevent cognitive decline in at-risk elderly people (FINGER): a randomised controlled trial. *Lancet* 2015; 385: 2255-63.
8. Andrieu S, *et al*. Effect of long-term omega 3 polyunsaturated fatty acid supplementation with or without multidomain intervention on cognitive function in elderly adults with memory complaints (MAPT): a randomised, placebo-controlled trial. *Lancet Neurol* 2017; 16: 377-389.
9. Moll van Charante EP, *et al*. Effectiveness of a 6-year multidomain vascular care intervention to prevent dementia (preDIVA): a cluster-randomised controlled trial. *Lancet* 2016; 388: 797-805.



- 1  
2  
3 10. Beishuizen CR, *et al.* Web-Based Interventions Targeting Cardiovascular Risk Factors in  
4  
5 Middle-Aged and Older People: A Systematic Review and Meta-Analysis. *J Med Internet*  
6  
7 *Res* 2016; 18: e55.  
8  
9
- 10 11. Neubeck L, *et al.* Planning locally relevant Internet programs for secondary prevention of  
11  
12 cardiovascular disease. *Eur J Cardiovasc Nurs* 2011; 10: 213-20.  
13
- 14 12. O'Connor S, *et al.* Understanding factors affecting patient and public engagement and  
15  
16 recruitment to digital health interventions: a systematic review of qualitative studies. *BMC*  
17  
18 *Med Inform Decis Ma* 2016; 16: 120.  
19
- 20 21. Andrieu S, *et al.* Representations and practices of prevention in elderly populations:  
22  
23 investigating acceptance to participate in and adherence to an intervention study for the  
24  
25 prevention of Alzheimer's disease (ACCEPT study)--the need for a multidisciplinary  
26  
27 approach. *J Nutr Health Aging* 2012; 16: 352-4.  
28  
29
- 30 31. Coley N, *et al.* Older Adults' Reasons for Participating in an eHealth Prevention Trial: A  
32  
33 Cross-Country, Mixed-Methods Comparison. *J Am Med Dir Assoc* 2019; 20: 843-49.  
34
- 35 15. World Health Organization. Adherence to long-term therapies: Evidence for action. 2003.  
36
- 37 16. Kickbush I, Maag D. Health literacy, in *International encyclopedia of public health*, K.  
38  
39 Heggenhougen and S. Quah, Editors. 2008, Academic Press: San Diego. p. 204-211.  
40
- 41 17. Fearn P, *et al.* Factors influencing the participation of older people in clinical trials - data  
42  
43 analysis from the MAVIS trial. *J Nutr Health Aging* 2010; 14: 51-6.  
44  
45
- 46 18. Walter U, *et al.* Putting prevention into practice: qualitative study of factors that inhibit and  
47  
48 promote preventive care by general practitioners, with a focus on elderly patients. *BMC*  
49  
50 *Fam Pract* 2010; 11: 68.  
51
- 52 19. Laditka SB, *et al.* Attitudes about aging well among a diverse group of older Americans:  
53  
54 implications for promoting cognitive health. *Gerontologist* 2009; 49 Suppl 1: S30-9.  
55  
56  
57  
58  
59  
60

- 1  
2  
3 20. Ligthart SA, *et al.* Perspectives of older people engaging in nurse-led cardiovascular  
4 prevention programmes: a qualitative study in primary care in the Netherlands. *Br J Gen*  
5 *Pract* 2015; 65: e41-8.  
6  
7  
8  
9  
10 21. Sorensen K, *et al.* Health literacy in Europe: comparative results of the European health  
11 literacy survey (HLS-EU). *Eur J Public Health* 2015; 25: 1053-8.  
12  
13  
14 22. Richard E, *et al.* Healthy Ageing Through Internet Counselling in the Elderly: the HATICE  
15 randomised controlled trial for the prevention of cardiovascular disease and cognitive  
16 impairment. *BMJ Open* 2016; 6: e010806.  
17  
18  
19  
20 23. Jongstra S, *et al.* Development and Validation of an Interactive Internet Platform for Older  
21 People: The Healthy Ageing Through Internet Counselling in the Elderly Study. *Telemed J*  
22 *E Health* 2017; 23: 96-104.  
23  
24  
25  
26  
27 24. Corbin J, Strauss A. *Basics of qualitative research: Techniques and procedures for developing*  
28 *grounded theory*, ed. 3rd. 2008, Thousand oaks, California: SAGE publications.  
29  
30  
31  
32 25. Healthy Aging Through Internet Counselling in the Elderly (HATICE). Collaborative project  
33 co-funded by the European Unions' Seventh framework programme (FP7, 2007-2013)  
34 under grant agreement No 305374. Last updated nov 2018; Available from:  
35 <http://www.hatice.eu/>.  
36  
37  
38  
39  
40  
41  
42 26. Tong A, Sainsbury P, Craig G. Consolidated criteria for reporting qualitative research  
43 (COREQ): a 32-item checklist for interviews and focus groups. *Int J Qual Health Care*  
44 2007; 19: 349-57.  
45  
46  
47  
48 27. World health organization and Alzheimer's disease international, Dementia: A public health  
49 priority. 2012, Geneva: World Health Organization.  
50  
51  
52  
53 28. Alzheimer's society. Public awareness of dementia: what every commissioner needs to know.  
54 London. 2009.  
55  
56  
57  
58  
59  
60

1  
2  
3  
4  
5  
6  
7  
8  
9  
10  
11  
12  
13  
14  
15  
16  
17  
18  
19  
20  
21  
22  
23  
24  
25  
26  
27  
28  
29  
30  
31  
32  
33  
34  
35  
36  
37  
38  
39  
40  
41  
42  
43  
44  
45  
46  
47  
48  
49  
50  
51  
52  
53  
54  
55  
56  
57  
58  
59  
60

29. Alzheimer's society. Dementia out of shadows. 2008; Available from:  
[www.alzheimers.org.uk/site/scripts/](http://www.alzheimers.org.uk/site/scripts/).
30. Clare L, Goater T, Woods B. Illness representations in early-stage dementia: a preliminary investigation. *Int J Geriatr Psychiatry* 2006; 21: 761-7.
31. Kielhofner G. *A Model of Human Occupation: Theory and Application*. 3rd ed, ed. 3rd. 2008, Baltimore: Williams and Wilkins.
32. Barnett E, Casper M. A definition of "social environment". *Am J Public Health* 2001; 91: 465.
33. Alladi S, Hachinski V. World dementia: One approach does not fit all. *Neurology* 2018; 91: 264-270.
34. Kenigsberg PA, *et al*. Dementia beyond 2025: Knowledge and uncertainties. *Dementia (London)* 2016; 15: 6-21.
35. Beishuizen CRL, *et al*. Integrating nurses' experiences with supporting behaviour change for cardiovascular prevention into a self-management internet-platform in Finland and Netherlands: a qualitative study. *BMJ Open* 2019; 9: e023480
36. Puska P, *et al*. Changes in coronary risk factors during comprehensive five-year community programme to control cardiovascular diseases (North Karelia project). *Br Med J* 1979; 2: 1173-8.
37. Barbera M, *et al*. Designing an Internet-Based Multidomain Intervention for the Prevention of Cardiovascular Disease and Cognitive Impairment in Older Adults: The HATICE Trial. *J Alzheimers Dis* 2018; 62: 649-663.

**Table 1** Summary demographics of the participants.

| Country                                                    | Finland |   |     | France |      | The Netherlands |      |      |
|------------------------------------------------------------|---------|---|-----|--------|------|-----------------|------|------|
|                                                            | 1       | 2 | 3   | 1      | 2    | 1               | 2    | 3    |
| Focus Group session                                        | 1       | 2 | 3   | 1      | 2    | 1               | 2    | 3    |
| nr                                                         | 9       | 9 | 10  | 9      | 7*   | 10              | 5*   | 6    |
| Average Age, Mean                                          | 70.4    |   | 66  | 72.3   | 71.1 | 69.0            | 69.2 | 83.7 |
| Gender, n (Female/Male)                                    | 3/6     |   | 8/2 | 3/6    | 2/5  | 4/6             | 2/3  | 3/3  |
| Participants with at least a secondary education degree, n | 4       |   | 3   | 8      | 6    | 6               | 4    | 6    |
| Participants with a history of CVD, n                      | 3       |   | 2   | 4      | 3    | 2               | 2    | 2    |
| Participants Internet literate                             | 9       |   | na  | 9      | 7    | 10              | 5    | 6    |

N, number; CVD, Cardiovascular disease; na, not asked

\*The participants of these focus groups are a subset of the participants who attended the previous session

**Table 2** Summary of main topics and sub-topics from the focus groups guide

---

|                                                                                 |
|---------------------------------------------------------------------------------|
| <b>Focus Group Round 1</b>                                                      |
| <b>Prevention of CVD and Dementia</b>                                           |
| Knowledge about prevention                                                      |
| Role of prevention in the development of CVD and dementia                       |
| <b>Internet use</b>                                                             |
| Participants' use and attitude towards the Internet                             |
| Requirements for a user-friendly website                                        |
| Preventive programmes delivered through the Internet                            |
| <b>Relationship with the healthcare provider</b>                                |
| Important factors to receive good guidance by the healthcare provider           |
| Important factors to establish a good relationship with the healthcare provider |

---

|                                                                             |
|-----------------------------------------------------------------------------|
| <b>Focus group Round 2</b>                                                  |
| <b>Layout of the HATICE platform*</b>                                       |
| Suggestion to make the layout more user friendly                            |
| Feedback on the monitoring functionalities                                  |
| <b>Role of the coach in the HATICE intervention</b>                         |
| Preferred mode of communication and frequency of contacts                   |
| Right for the coach to access the participants' information on the platform |
| Role of the coach in the goal setting process                               |
| <b>Peer support in the HATICE platform</b>                                  |
| Attitude towards a peer Internet forum                                      |
| <b>Self-support in the HATICE intervention</b>                              |
| Information about CVD and dementia required on the platform                 |
| What type of news items / newsletter the participants will be interested in |
| Digital rewards automatic reminders and comparison with peers as motivators |

---

|                                                                                                   |
|---------------------------------------------------------------------------------------------------|
| <b>Focus Group Round 3</b>                                                                        |
| <b>Prevention</b>                                                                                 |
| What prevention is, when it should start, who benefits, importance of genetic predisposition      |
| Can CVD be prevented? How? Risk factors, barriers and motivators                                  |
| Can dementia be prevented? How? Risk factors, barriers and motivators                             |
| Comparison between CVD and dementia and their prevention                                          |
| <b>Motivation towards prevention</b>                                                              |
| Motivating factors to act towards prevention                                                      |
| Barriers to act towards prevention                                                                |
| <b>Stigma of AD/dementia (topic covered mostly in the Finnish focus group)</b>                    |
| How the differences between CVD and dementia affect motivation towards prevention                 |
| How the differences between CVD and dementia affect the relationship with the healthcare provider |
| Different attitude of individuals and society towards dementia compared to CVD                    |
| The role of fear                                                                                  |

---

CVD, Cardiovascular disease

\*The platform had not been yet finalised at the time of the second round of focus groups, therefore a preliminary version was shown

1  
2  
3 **Table 3 Overview of the core category and categories**  
4

---

5 **Core Category**

---

6 Interactive process of three identified categories influencing  
7 engagement in self-management prevention programme  
8

---

9

10 **Categories**

---

11

12

13 Access to reliable information

14

15 Trust in healthcare providers

16

17

18 Burden and stigma of dementia  
19

---

20  
21  
22  
23  
24  
25  
26  
27  
28  
29  
30  
31  
32  
33  
34  
35  
36  
37  
38  
39  
40  
41  
42  
43  
44  
45  
46  
47  
48  
49  
50  
51  
52  
53  
54  
55  
56  
57  
58  
59  
60

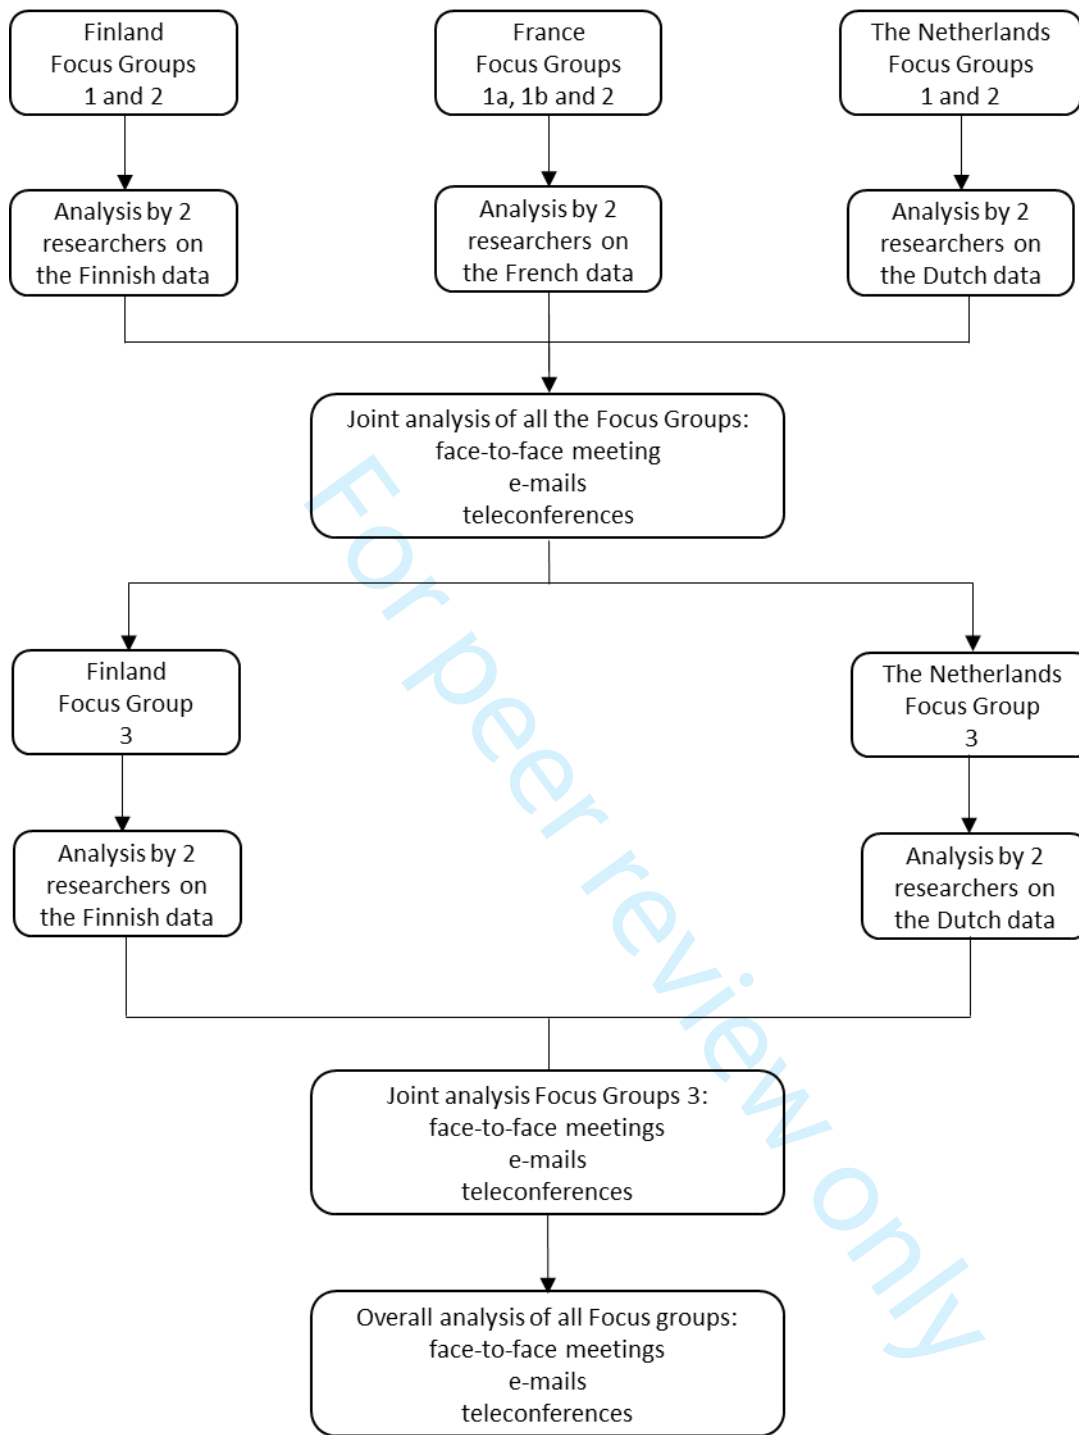

**Figure 1** Different stages of data collection and analysis.

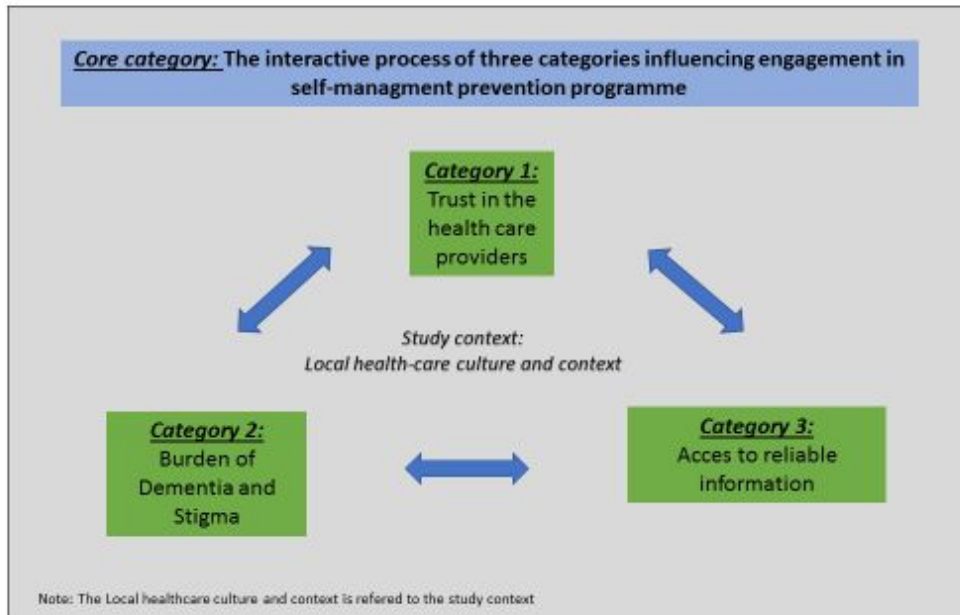

**Figure 2** Presentation of the core category and interactions between categories



## COREQ (CONsolidated criteria for REporting Qualitative research) Checklist

A checklist of items that should be included in reports of qualitative research. You must report the page number in your manuscript where you consider each of the items listed in this checklist. If you have not included this information, either revise your manuscript accordingly before submitting or note N/A.

| Topic                                          | Item No. | Guide Questions/Description                                                                                                                              | Reported on Page No. |
|------------------------------------------------|----------|----------------------------------------------------------------------------------------------------------------------------------------------------------|----------------------|
| <b>Domain 1: Research team and reflexivity</b> |          |                                                                                                                                                          |                      |
| <i>Personal characteristics</i>                |          |                                                                                                                                                          |                      |
| Interviewer/facilitator                        | 1        | Which author/s conducted the interview or focus group?                                                                                                   |                      |
| Credentials                                    | 2        | What were the researcher's credentials? E.g. PhD, MD                                                                                                     |                      |
| Occupation                                     | 3        | What was their occupation at the time of the study?                                                                                                      |                      |
| Gender                                         | 4        | Was the researcher male or female?                                                                                                                       |                      |
| Experience and training                        | 5        | What experience or training did the researcher have?                                                                                                     |                      |
| <i>Relationship with participants</i>          |          |                                                                                                                                                          |                      |
| Relationship established                       | 6        | Was a relationship established prior to study commencement?                                                                                              |                      |
| Participant knowledge of the interviewer       | 7        | What did the participants know about the researcher? e.g. personal goals, reasons for doing the research                                                 |                      |
| Interviewer characteristics                    | 8        | What characteristics were reported about the interviewer/facilitator? e.g. Bias, assumptions, reasons and interests in the research topic                |                      |
| <b>Domain 2: Study design</b>                  |          |                                                                                                                                                          |                      |
| <i>Theoretical framework</i>                   |          |                                                                                                                                                          |                      |
| Methodological orientation and Theory          | 9        | What methodological orientation was stated to underpin the study? e.g. grounded theory, discourse analysis, ethnography, phenomenology, content analysis |                      |
| <i>Participant selection</i>                   |          |                                                                                                                                                          |                      |
| Sampling                                       | 10       | How were participants selected? e.g. purposive, convenience, consecutive, snowball                                                                       |                      |
| Method of approach                             | 11       | How were participants approached? e.g. face-to-face, telephone, mail, email                                                                              |                      |
| Sample size                                    | 12       | How many participants were in the study?                                                                                                                 |                      |
| Non-participation                              | 13       | How many people refused to participate or dropped out? Reasons?                                                                                          |                      |
| <i>Setting</i>                                 |          |                                                                                                                                                          |                      |
| Setting of data collection                     | 14       | Where was the data collected? e.g. home, clinic, workplace                                                                                               |                      |
| Presence of non-participants                   | 15       | Was anyone else present besides the participants and researchers?                                                                                        |                      |
| Description of sample                          | 16       | What are the important characteristics of the sample? e.g. demographic data, date                                                                        |                      |
| <i>Data collection</i>                         |          |                                                                                                                                                          |                      |
| Interview guide                                | 17       | Were questions, prompts, guides provided by the authors? Was it pilot tested?                                                                            |                      |
| Repeat interviews                              | 18       | Were repeat interviews carried out? If yes, how many?                                                                                                    |                      |
| Audio/visual recording                         | 19       | Did the research use audio or visual recording to collect the data?                                                                                      |                      |
| Field notes                                    | 20       | Were field notes made during and/or after the interview or focus group?                                                                                  |                      |
| Duration                                       | 21       | What was the duration of the interviews or focus group?                                                                                                  |                      |
| Data saturation                                | 22       | Was data saturation discussed?                                                                                                                           |                      |
| Transcripts returned                           | 23       | Were transcripts returned to participants for comment and/or                                                                                             |                      |

| Topic                                  | Item No. | Guide Questions/Description                                                                                                        | Reported on Page No. |
|----------------------------------------|----------|------------------------------------------------------------------------------------------------------------------------------------|----------------------|
|                                        |          | correction?                                                                                                                        |                      |
| <b>Domain 3: analysis and findings</b> |          |                                                                                                                                    |                      |
| <i>Data analysis</i>                   |          |                                                                                                                                    |                      |
| Number of data coders                  | 24       | How many data coders coded the data?                                                                                               |                      |
| Description of the coding tree         | 25       | Did authors provide a description of the coding tree?                                                                              |                      |
| Derivation of themes                   | 26       | Were themes identified in advance or derived from the data?                                                                        |                      |
| Software                               | 27       | What software, if applicable, was used to manage the data?                                                                         |                      |
| Participant checking                   | 28       | Did participants provide feedback on the findings?                                                                                 |                      |
| <i>Reporting</i>                       |          |                                                                                                                                    |                      |
| Quotations presented                   | 29       | Were participant quotations presented to illustrate the themes/findings?<br>Was each quotation identified? e.g. participant number |                      |
| Data and findings consistent           | 30       | Was there consistency between the data presented and the findings?                                                                 |                      |
| Clarity of major themes                | 31       | Were major themes clearly presented in the findings?                                                                               |                      |
| Clarity of minor themes                | 32       | Is there a description of diverse cases or discussion of minor themes?                                                             |                      |

Developed from: Tong A, Sainsbury P, Craig J. Consolidated criteria for reporting qualitative research (COREQ): a 32-item checklist for interviews and focus groups. *International Journal for Quality in Health Care*. 2007. Volume 19, Number 6: pp. 349 – 357

**Once you have completed this checklist, please save a copy and upload it as part of your submission. DO NOT include this checklist as part of the main manuscript document. It must be uploaded as a separate file.**

# BMJ Open

## Attitudes of at-risk older adults about prevention of cardiovascular disease and dementia using eHealth: a qualitative study in a European context

|                                 |                                                                                                                                                                                                                                                                                                                                                                                                                                                                                                                                                                                                                                                                                                                                                                                                                                                                                                                                                                                                                                                                                                                                                                                                                                                                                                                                                                                                                                                                                                                                                  |
|---------------------------------|--------------------------------------------------------------------------------------------------------------------------------------------------------------------------------------------------------------------------------------------------------------------------------------------------------------------------------------------------------------------------------------------------------------------------------------------------------------------------------------------------------------------------------------------------------------------------------------------------------------------------------------------------------------------------------------------------------------------------------------------------------------------------------------------------------------------------------------------------------------------------------------------------------------------------------------------------------------------------------------------------------------------------------------------------------------------------------------------------------------------------------------------------------------------------------------------------------------------------------------------------------------------------------------------------------------------------------------------------------------------------------------------------------------------------------------------------------------------------------------------------------------------------------------------------|
| Journal:                        | <i>BMJ Open</i>                                                                                                                                                                                                                                                                                                                                                                                                                                                                                                                                                                                                                                                                                                                                                                                                                                                                                                                                                                                                                                                                                                                                                                                                                                                                                                                                                                                                                                                                                                                                  |
| Manuscript ID                   | bmjopen-2020-037050.R1                                                                                                                                                                                                                                                                                                                                                                                                                                                                                                                                                                                                                                                                                                                                                                                                                                                                                                                                                                                                                                                                                                                                                                                                                                                                                                                                                                                                                                                                                                                           |
| Article Type:                   | Original research                                                                                                                                                                                                                                                                                                                                                                                                                                                                                                                                                                                                                                                                                                                                                                                                                                                                                                                                                                                                                                                                                                                                                                                                                                                                                                                                                                                                                                                                                                                                |
| Date Submitted by the Author:   | 27-Mar-2020                                                                                                                                                                                                                                                                                                                                                                                                                                                                                                                                                                                                                                                                                                                                                                                                                                                                                                                                                                                                                                                                                                                                                                                                                                                                                                                                                                                                                                                                                                                                      |
| Complete List of Authors:       | <p>Akenine, Ulrika; Karolinska Institutet and Karolinska University Hospital, Division of Clinical Geriatrics , Department of Neurobiology, Care Sciences and Society<br/> Barbera, Mariagnese; University of Eastern Finland, Clinical Medicine/Neurology<br/> Beishuizen, Cathrien; Academic Medical Center, General Practice<br/> Fallah Pour, Mandana; Karolinska Institutet, Division of Occupational Therapy, Department of Neurobiology, Care Sciences and Society<br/> Guillemont, Juliette; University of Toulouse 111, INSERM<br/> Rosenberg, Anna; University of Eastern Finland, Clinical Medicine/Neurology<br/> Coley, Nicola; University of Toulouse, Epidemiology and public health<br/> Mangialasche, Francesca; Karolinska Institutet, Division of Geriatric Epidemiology<br/> Salo, Lotta; University of Eastern Finland School of Medicine, Institutet of Clinical Medicine<br/> Savy, Stephanie; University of Toulouse 111, INSERM<br/> Pols, A.; AMC, General Practice<br/> Andrieu , Sandrine; University of Toulouse 111, INSERM<br/> Richard, Edo; Academic Medical Center/University of Amsterdam, Department of Neurology; Radboud University Medical Center, Department of Neurology<br/> Soininen, Hilikka; Institute of Clinical Medicine - Neurology, University of Eastern Finland, Kuopio, Finland; Neurocenter Neurology, Kuopio University Hospital, Kuopio, Finland<br/> Moll van Charante, Eric; AMC, General Practice<br/> Kivipelto, Miia; Karolinska Institutet, Division of Geriatric Epidemiology</p> |
| <b>Primary Subject Heading</b>: | Public health                                                                                                                                                                                                                                                                                                                                                                                                                                                                                                                                                                                                                                                                                                                                                                                                                                                                                                                                                                                                                                                                                                                                                                                                                                                                                                                                                                                                                                                                                                                                    |
| Secondary Subject Heading:      | Geriatric medicine                                                                                                                                                                                                                                                                                                                                                                                                                                                                                                                                                                                                                                                                                                                                                                                                                                                                                                                                                                                                                                                                                                                                                                                                                                                                                                                                                                                                                                                                                                                               |
| Keywords:                       | Dementia < NEUROLOGY, PREVENTIVE MEDICINE, PUBLIC HEALTH                                                                                                                                                                                                                                                                                                                                                                                                                                                                                                                                                                                                                                                                                                                                                                                                                                                                                                                                                                                                                                                                                                                                                                                                                                                                                                                                                                                                                                                                                         |
|                                 |                                                                                                                                                                                                                                                                                                                                                                                                                                                                                                                                                                                                                                                                                                                                                                                                                                                                                                                                                                                                                                                                                                                                                                                                                                                                                                                                                                                                                                                                                                                                                  |

1  
2  
3  
4  
5  
6  
7  
8  
9  
10  
11  
12  
13  
14  
15  
16  
17  
18  
19  
20  
21  
22  
23  
24  
25  
26  
27  
28  
29  
30  
31  
32  
33  
34  
35  
36  
37  
38  
39  
40  
41  
42  
43  
44  
45  
46  
47  
48  
49  
50  
51  
52  
53  
54  
55  
56  
57  
58  
59  
60

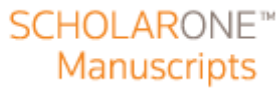



I, the Submitting Author has the right to grant and does grant on behalf of all authors of the Work (as defined in the below author licence), an exclusive licence and/or a non-exclusive licence for contributions from authors who are: i) UK Crown employees; ii) where BMJ has agreed a CC-BY licence shall apply, and/or iii) in accordance with the terms applicable for US Federal Government officers or employees acting as part of their official duties; on a worldwide, perpetual, irrevocable, royalty-free basis to BMJ Publishing Group Ltd ("BMJ") its licensees and where the relevant Journal is co-owned by BMJ to the co-owners of the Journal, to publish the Work in this journal and any other BMJ products and to exploit all rights, as set out in our [licence](#).

The Submitting Author accepts and understands that any supply made under these terms is made by BMJ to the Submitting Author unless you are acting as an employee on behalf of your employer or a postgraduate student of an affiliated institution which is paying any applicable article publishing charge ("APC") for Open Access articles. Where the Submitting Author wishes to make the Work available on an Open Access basis (and intends to pay the relevant APC), the terms of reuse of such Open Access shall be governed by a Creative Commons licence – details of these licences and which [Creative Commons](#) licence will apply to this Work are set out in our licence referred to above.

Other than as permitted in any relevant BMJ Author's Self Archiving Policies, I confirm this Work has not been accepted for publication elsewhere, is not being considered for publication elsewhere and does not duplicate material already published. I confirm all authors consent to publication of this Work and authorise the granting of this licence.

**Title page****Attitudes of at-risk older adults about prevention of cardiovascular disease and dementia using eHealth: a qualitative study in a European context****Authors**

Ulrika Akenine<sup>1,12\*§</sup>, Mariagnese Barbera<sup>2\*</sup>, Cathrien RL Beishuizen<sup>3\*</sup>, Mandana Fallahpour<sup>1,4</sup>, Juliette Guillemont<sup>5</sup>, Anna Rosenberg<sup>2</sup>, Nicola Coley<sup>5,6</sup>, Francesca Mangialasche<sup>1,7</sup>, Lotta Salo<sup>2</sup>, Stéphanie Savy<sup>5</sup>, A Jeannette Pols<sup>8</sup>, Sandrine Andrieu<sup>5,6</sup>, Edo Richard<sup>9,10</sup>, Hilikka Soininen<sup>2,11</sup>, Eric Moll van Charante<sup>3</sup>, and Miia Kivipelto<sup>1,12-15</sup> for the HATICE study group\*\*.

\* These authors contributed equally to the study

\*\* Full list of the members of the HATICE study group can be found at the end of the manuscript

**Affiliations**

1, Division of Clinical Geriatrics, Center for Alzheimer research, Department of Neurobiology, Care Sciences and Society, Karolinska Institutet, Stockholm, Sweden; 2, Department of Neurology, Institute of Clinical Medicine, University of Eastern Finland, Kuopio, Finland; 3, Department of General Practice, Amsterdam UMC/University of Amsterdam, Amsterdam, The Netherlands; 4, Division of Occupational Therapy, Department of Neurobiology, Care Sciences and Society, Karolinska Institutet, Stockholm, Sweden; 5, INSERM, University of Toulouse, Toulouse, France; 6, Department of Epidemiology and Public Health, Toulouse University Hospital, Toulouse, France; 7, Aging Research Center, Department of Neurobiology, Care Sciences and Society, Karolinska Institutet and Stockholm University, Stockholm, Sweden; 8, Section of Medical Ethics, Department of General Practice, Amsterdam UMC/University of

1  
2  
3 Amsterdam, Amsterdam, The Netherlands; 9, Department of Neurology, Amsterdam  
4  
5 UMC/University of Amsterdam, Amsterdam, The Netherlands; 10, Department of Neurology,  
6  
7 Donders Institute for Brain, Cognition and Behaviour, Radboud University Medical Center,  
8  
9 Nijmegen, The Netherlands; 11, Neurocenter, Neurology, Kuopio University Hospital, Kuopio,  
10  
11 Finland; 12, Theme Aging, Karolinska University Hospital, Stockholm, Sweden 13, Stockholms  
12  
13 Sjukhem, R&D unit, Stockholm, Sweden; 14, Neuroepidemiology and Ageing Research Unit,  
14  
15 School of Public Health, Imperial College London, London, United Kingdom; 15, Institute of  
16  
17 Public Health and Clinical Nutrition, University of Eastern Finland, Kuopio, Finland.  
18  
19  
20  
21  
22  
23

24 **§Corresponding author:**

25  
26 Ulrika Akenine

27  
28 Karolinska Institutet, Department of Neurobiology, Care Sciences and Society, Division of Clinical  
29  
30 Geriatrics, Stockholm, Sweden

31  
32 Karolinska vägen 37A, QA32

33  
34 SE-171 64 Solna

35  
36 Sweden

37  
38 Tel: +46 70 667 99 67

39  
40 E-mail: [Ulrika.Akenine@ki.se](mailto:Ulrika.Akenine@ki.se)  
41  
42  
43  
44  
45  
46  
47  
48

49 **Keywords:** Cardiovascular disease, dementia, eHealth, qualitative methods, prevention  
50  
51  
52  
53  
54  
55  
56  
57  
58  
59  
60

1  
2  
3 **Attitudes of at-risk older adults about prevention of cardiovascular disease and dementia**  
4  
5 **using eHealth: a qualitative study in a European context**  
6  
7

8 **ABSTRACT**  
9

10 **Objectives:** Prevention of cardiovascular disease (CVD) and dementia is a key health priority  
11 among older adults. Understanding individuals' attitudes to, the prevention of these conditions,  
12 particularly when delivered through novel eHealth tools, could help in designing effective  
13 prevention programmes. The aim of the study was to explore the attitudes of older adults at  
14 increased risk of CVD and dementia regarding engagement in eHealth self-management  
15 prevention programmes, and to describe the facilitators and barriers.  
16  
17  
18  
19  
20  
21  
22  
23

24 **Design:** A qualitative research approach was used. Data were collected through eight focus groups  
25 in Finland, France, and the Netherlands. Data were analysed following the principles of grounded  
26 theory.  
27  
28  
29  
30

31 **Setting and participants:** Forty-four community dwellers aged 65+ at risk of CVD were  
32 recruited from a previous trial cohort in Finland, and through general practices in France and the  
33 Netherlands.  
34  
35  
36  
37

38 **Results:** The study identified three categories: access to reliable information, trust in the  
39 healthcare providers, and burden and stigma of dementia. A core category was also identified: the  
40 interactive process of the three categories influencing engagement in self-management prevention  
41 programme. The categories were interconnected through an interactive process and influenced by  
42 the local healthcare culture and context which shaped them differently, becoming either  
43 facilitators or barriers to engage in eHealth self-management prevention programmes.  
44  
45  
46  
47  
48  
49  
50

51 **Conclusions:** The study emphasises the importance of considering the interactions between the  
52 identified categories in this study, grounded in the local healthcare culture and context in further  
53 developments of eHealth self-management interventions that aim to prevent CVD and dementia.  
54  
55  
56  
57  
58

59 **Trial registration number: ISRCTN48151589; Pre-results**  
60



### Strengths and limitations of the study

- This qualitative study benefits from an international setting focusing on older adults' attitudes regarding prevention of CVD and dementia across the three West-European countries.
- The HATICE research team has expertise in qualitative, clinical and basic science research, ensuring an international perspective and a thorough understanding of the local healthcare settings.
- Due to the exploratory nature of the study and to ensure the richness of the data for data analysis, eight sessions of focus groups were conducted with 48 participants in total, in three West-European countries.
- Language barriers, as a limitation in the study, were decreased by aligning the research methodologies, applying an iterative process during data analysis and extensive discussions within the research group.

## INTRODUCTION

As the number of older adults increases world-wide, a rise in persons with cardiovascular disease (CVD) and dementia has been reported,<sup>1,2</sup> causing health, economic and social burdens.<sup>3</sup>

Prevention of CVD and dementia has been identified as a world-wide health priority.<sup>2,4,5</sup> Both CVD and dementia share several modifiable risk factors<sup>1,2,6</sup> – e.g., hypertension, hypercholesterolaemia, diabetes mellitus, obesity, smoking, physical inactivity, unhealthy diet – providing the opportunity to test novel prevention interventions targeting both conditions.<sup>7-9</sup>

Prevention of CVD and dementia among older adults is however complex requiring a combination of primary and secondary prevention, and even more challenging among those with existing comorbidity, or those labelled with real diseases but no clear symptoms which makes the distinction between primary and secondary prevention unclear and difficult.<sup>10</sup> Promising novel prevention strategies, include eHealth, for its ease of access and of use.<sup>11,12</sup> However, engaging the general population with eHealth might be challenging,<sup>13</sup> and more insight is needed on how to maximise its advantages among older adults.

Successful prevention programmes are based on factors such as the selection of appropriate target populations, the implementation of optimal interventions, and using suitable delivery modalities.<sup>14,15</sup> Furthermore, engagement<sup>16</sup> and health literacy, and the ability to make sound decisions concerning health among the target population,<sup>17</sup> are crucial for the success of any public health intervention. Although risk factors have been identified, little is known about attitudes of older adults who are at-risk of CVD and dementia about prevention initiatives, including eHealth. The design of prevention programmes tailored to this age group is therefore particularly challenging, and preventive trials among older adults are relatively scarce.<sup>18</sup> Such knowledge would be important for designing more effective preventive programmes and facilitating individuals' engagement.

1  
2  
3 The factors influencing engagement in prevention programmes have been partially investigated  
4 using qualitative approaches.<sup>19-21</sup> Previous studies suggested that a positive attitude of the  
5  
6 participant is essential to implement effective preventive care,<sup>19</sup> which in turn promotes healthy  
7  
8 cognitive ageing.<sup>20</sup> However, it is unclear how this positive attitude can be supported. A personal  
9  
10 relationship between the healthcare provider and the patient seems to be beneficial,<sup>21</sup> but more  
11  
12 evidence is needed on how to best encourage lifestyle self-management. Previous research from  
13  
14 our research group has considered self-management and eHealth applications as promising  
15  
16 strategies to support prevention.<sup>22</sup> In self-management, the individual takes the responsibility and  
17  
18 lead to manage his/her risk factors, instead of the healthcare provider.<sup>23, 24</sup> Applying eHealth has  
19  
20 the potential to support self-management due to its advantages, such as suitability for health  
21  
22 education, interactivity and monitoring.<sup>25, 26</sup> Previous research found (i) establishing a relationship  
23  
24 of trust, (ii) managing awareness and expectations, and (iii) appropriate timing and monitoring of  
25  
26 the process of behaviour change, as important to support an effective behaviour change in  
27  
28 prevention of CVD and cognitive decline.<sup>22</sup> In addition, the previous literature has not  
29  
30 simultaneously considered both CVD and dementia, and international studies are still scarce.  
31  
32 Factors related to the country-specific context might considerably impact individuals' perception  
33  
34 of prevention.<sup>27</sup> For example, accessing novel tools for healthcare can be perceived as a challenge,  
35  
36 especially in areas where new technologies are not well established.<sup>11</sup>  
37  
38 The present study is part of the Healthy Aging Through Internet Counselling in the Elderly  
39  
40 (HATICE) project.<sup>28</sup> The HATICE project tested the efficacy of an eHealth multidomain  
41  
42 intervention, including a coach-supported internet platform<sup>29</sup> to improve older adults' self-  
43  
44 management of risk factors for CVD and dementia, in a European randomised controlled trial  
45  
46 (RCT). The RCT was carried out in Finland, France, and the Netherlands. The aim of this sub-  
47  
48 study was to explore the attitudes of older adults at increased risk of CVD and dementia regarding  
49  
50  
51  
52  
53  
54  
55  
56  
57  
58  
59  
60

1  
2  
3 engagement in eHealth self-management prevention programmes, and to describe the facilitators  
4  
5 and barriers.  
6  
7  
8  
9

## 10 **METHODS**

### 11 **Design**

12  
13 The study applied a qualitative research approach following the principles of grounded theory,<sup>30</sup>  
14  
15 and was structured in sequential steps of data collection performed in three rounds of focus groups  
16  
17 and analyses (figure 1). The study benefited from an international research group in the HATICE  
18  
19 project<sup>31</sup> providing the knowledge and expertise in qualitative, clinical and basic science research,  
20  
21 and ensuring an international perspective with an in-depth understanding of the local healthcare  
22  
23 settings.  
24  
25  
26  
27

28  
29 The study was conducted following the consolidated criteria for reporting qualitative research  
30  
31 (COREQ).<sup>32</sup>  
32  
33

### 34 **Participants**

35  
36  
37 Forty-four older adults at risk of CVD were purposively recruited from (i) a previous trial cohort<sup>7</sup>  
38  
39 (Finland) and (ii) through general practices (France, the Netherlands) (Table 1). In order to recruit  
40  
41 a population as similar as possible to the one that would have been recruited in the actual trial,  
42  
43 participants were recruited using a simplified but comprehensive version of the inclusion criteria  
44  
45 applied in the HATICE RCT<sup>28</sup> The criteria were defined as follows: (i) age  $\geq 65$  years, (ii) basic  
46  
47 internet literacy defined as use of email, (iii)  $\geq 2$  self-reported cardiovascular risk factors defined  
48  
49 as: hypertension (diagnosis or medication prescription), dyslipidaemia (diagnosis or medication  
50  
51 prescription), active smoking, and lack of physical exercise defined based on the WHO guidelines  
52  
53 (at least 150 minutes of moderate intensity exercise per week); and/or (iv) self-reported history of  
54  
55  
56  
57  
58  
59  
60

1  
2  
3 CVD (stroke/transient ischaemic attack, myocardial infarction, angina pectoris and/or peripheral  
4 arterial disease), (v) self-reported diagnosis of diabetes mellitus.

7  
8 The HATICE study was approved by the medical ethics committee of the Academic Medical  
9 Center (Netherlands), the Comité de Protection des Personnes Sud Ouest et Outre Mer (France),  
10 and the Northern Savo Hospital District Research Ethics Committee (Finland). For the present  
11 sub-study, no separate approval was required in Finland and France; in the Netherlands, approval  
12 was obtained from the medical ethics committee of the Academic Medical Centre.  
13  
14  
15  
16  
17  
18  
19

## 20 **Setting**

21  
22  
23 Due to the international setting of the present study, different primary healthcare systems are  
24 relevant to be described shortly. In Finland, primary healthcare is provided in healthcare centres to  
25 which people are automatically assigned based on the address of residence. Their size, both in  
26 terms of patients cared for and catchment area, can vary significantly due to large differences in  
27 population density,<sup>33</sup> which can lead to difference in the service provided for non-emergent cases  
28 and prevention programmes. Nurses are the “gatekeeper” of the system and one of the main  
29 figures in relation to prevention. The patients are not assigned to a specific general practitioner  
30 (GP).<sup>34</sup> In France, GPs usually work in “solo” practice and citizens can choose to which practice  
31 to register based on availability.<sup>35</sup> Patients are, therefore, followed by the same physician and  
32 same-day appointments are usually available for non-emergent cases. Nurses can provide care,  
33 mostly preventive, tertiary or palliative care, but only upon GP prescription. They are also  
34 involved in screening programmes and health education.<sup>36</sup> As in Finland, primary healthcare in the  
35 Netherlands is provided within healthcare centres that are, however, more evenly distributed in a  
36 country with a much higher population density compared to Finland. Patients register with a  
37 specific GP, making the doctor-patient relationship consistent and, to some extent, similar to the  
38 French system. However, nurses in the Netherlands have somehow a more independent role (e.g.,  
39  
40  
41  
42  
43  
44  
45  
46  
47  
48  
49  
50  
51  
52  
53  
54  
55  
56  
57  
58  
59  
60

1  
2  
3 carry out specific consultations, such as for diabetes care and cardiovascular risk management, and  
4  
5 can prescribe certain types of medications).<sup>37</sup>  
6  
7

### 8 **Data collection**

9  
10 Eight focus group sessions structured in three rounds (figure 1) were conducted between October  
11  
12 2013 and September 2015. A semi-structured focus group interview guide was used,<sup>38</sup> including  
13  
14 three sessions in Finland, three in the Netherlands and two in France. The interview guide  
15  
16 comprised the main topics and sub-topics focusing on participants' attitudes regarding engagement  
17  
18 in eHealth self-management prevention programmes, and the facilitators and barriers (Table 2).  
19  
20 Two members of each local research team were present at each session (average duration of two  
21  
22 hours): (i) an experienced moderator in qualitative research, and (ii) an assistant to take notes. The  
23  
24 meetings were tape-recorded and transcribed verbatim, except for the first meeting in Finland and  
25  
26 the second in France, due to technical issues in the tape-recording. The researchers' detailed notes  
27  
28 from these two sessions were therefore analysed instead.  
29  
30  
31  
32  
33  
34  
35

### 36 **Data analysis**

37  
38 The data were analysed following the principles of grounded theory.<sup>30</sup> In each country, two  
39  
40 researchers independently identified codes, combined and compared them in the axial-coding  
41  
42 phase, created the categories, which were confirmed through consensus. The analyses were  
43  
44 therefore performed in the local language, except in Finland, where neither of the researchers were  
45  
46 native speakers. The transcripts and notes were first translated into English and independently  
47  
48 cross-checked by two team members, both Finnish native- and English fluent-speakers. After  
49  
50 completing the analyses of the first six sessions in each country, the findings were combined in  
51  
52 English, and further discussed and compared by the full team in a face-to-face meeting. To ensure  
53  
54 that the results were grounded in the data and focused on interactions between the categories, the  
55  
56 analyses formed an iterative process, transitioning from the original data to the categories.  
57  
58  
59  
60

1  
2  
3 Moreover, a third round of focus groups was organised in the Netherlands and in Finland to enrich  
4 the data and get a better understanding about ‘prevention in general’, ‘prevention of CVD’,  
5  
6 ‘prevention of dementia’ and ‘individuals’ perspectives on ‘eHealth self-management prevention  
7  
8 programmes’. To increase the credibility of the findings, the analysis was extensively discussed  
9  
10 within the research group, both at a national and an A summary of the conclusions of the third  
11  
12 focus group was returned to the participants to check for trustworthiness of the data. international  
13  
14 level until agreement was reached.  
15  
16  
17  
18  
19  
20

### 21 **Patient and public involvement**

22  
23 Patients were not involved in this study. However, the participants were older adults at risk of  
24  
25 CVD and dementia who were directly involved in the development of the HATICE eHealth  
26  
27 application by taking part in focus groups in this sub-study (See inclusion criteria in methods).  
28  
29  
30  
31  
32

## 33 **RESULTS**

34  
35 Three categories were identified, and a core category was developed, representing the  
36  
37 the attitudes of older adults at increased risk of CVD and dementia regarding engagement in  
38  
39 eHealth self-management prevention programmes, and the facilitators and barriers (See figure 2).  
40  
41  
42  
43  
44

### 45 **Access to reliable information about CVD and dementia**

46  
47 Participants experienced confusion regarding the general meaning of prevention, and in particular  
48  
49 prevention of CVD and dementia. Prevention was generally described as acting to avoid a certain  
50  
51 disease, but when discussing how prevention should be put into practice, participants focused  
52  
53 mostly on how to identify symptoms and when to initiate a treatment. Unawareness of the right  
54  
55 time to act was described as the main barrier to engage in prevention. Participants could name risk  
56  
57 factors for CVD and dementia, but they could not concretely explain how to manage them.  
58  
59  
60

1  
2  
3 *“It is important to recognise the symptoms [...]. For example, chest pain. [...] Make sure you visit*  
4 *the doctor in time and know what you should be alerted of.” (fg1, Dutch participant)*

5  
6  
7  
8 *(fg = focus group)*  
9

10  
11  
12 In all three countries, participants expressed a need for reliable information about CVD and  
13 dementia, and on how to put general recommendations into practice. Access to reliable  
14 information was regarded as essential to empower them towards prevention, and their lack of  
15 knowledge about these diagnoses represented a significant barrier to take action. They described  
16 reliable information as comprehensive information that is easy to understand, tailored to each  
17 individual situation and provided by a trustworthy source.  
18  
19  
20  
21  
22  
23  
24

25  
26 *“[We need] a reference [...], a website with a search engine, information on diseases, up to date,*  
27 *specific”.* (fg1, French participant)  
28  
29

30  
31  
32  
33 Not being able to distinguish trustworthy from untrustworthy sources was identified as another  
34 barrier. This was especially true for health-related information received from the Internet. The  
35 participants stressed that an eHealth platform, including support from a caregiver, can provide  
36 trustworthy information by authorised sources, tailored to individual needs.  
37  
38  
39  
40

41  
42 *“Young people surf and search much more on the Internet than the elderly. The elderly have much*  
43 *more difficulty to judge what information is of good quality and what isn't.” (fg1, Dutch*  
44 *participant)*  
45  
46  
47  
48  
49

### 50 **Trust in the healthcare provider**

51  
52 The participants described that trust in their primary healthcare providers, including their GPs and  
53 nurses, as well as trust in the received health-related information and the healthcare system, is a  
54 prerequisite to engage in prevention programmes. Some participants mentioned that in order to  
55  
56  
57  
58  
59  
60



1  
2  
3 provide the best possible medical advice, healthcare providers need to know their patients  
4  
5 personally.  
6

7  
8 The participants referred to trust in different ways. Participants in France and the Netherlands  
9  
10 highlighted the importance of having a good relationship with their primary healthcare providers,  
11  
12 being one of the most important motivators to engage in prevention programmes including those  
13  
14 delivered through eHealth tools. In fact, when discussing the HATICE platform, the Dutch and  
15  
16 French participants expressed concerns regarding the interference with the regular healthcare  
17  
18 provider who, to ensure continuity of care, expressed a strong preference for an eHealth  
19  
20 prevention programme managed by their own primary healthcare provider.  
21  
22

23  
24 *“You would prefer to go to your own GP who knows you already since so many years, rather*  
25  
26 *than commit to someone you do not know.” (fg3, Dutch participant)*  
27  
28

29  
30  
31 Although the Finnish participants did not stress this aspect, they acknowledged the role of trust in  
32  
33 the eHealth lifestyle coach and in data integrity when managing personal information as  
34  
35 encouraging factors to actively participate in such eHealth prevention programmes.  
36

37  
38 *“Trust and expertise [are the most important qualities]” (fg1, Finnish participant)*  
39  
40

41 While Dutch and French participants strongly relied on their GPs and took their advice seriously,  
42  
43 Finnish participants described themselves as more independent and critical towards medical  
44  
45 advice. The Finnish participants stressed the importance of their autonomy and own responsibility  
46  
47 for their health and prevention, expressing their pronounced interest in health self-management.  
48  
49

50  
51 *“If your doctor prescribes medication you take it. After all, he has your best interest at heart.*  
52  
53 *Even if you don't want to take them.” (fg3, Dutch participant)*  
54  
55

56  
57 *“[Prevention is the] patient's responsibility for him/herself.” (fg1, Finnish participant)*  
58

## 59 **Burden and stigma of dementia**

60

1  
2  
3 The participants compared the possibilities for prevention of CVD with those of dementia. They  
4 described CVD as having good treatment options and a possibility to recover, compared with  
5 dementia as a condition with no possibility for recovery. Participants associated feelings of fear,  
6 shame and hopelessness in anticipation of developing dementia.  
7  
8  
9

10  
11  
12 *“You cannot reverse dementia, and from a cerebral infarction or heart infarction you can still*  
13 *recover.” (fg3, Dutch participant)*  
14

15  
16  
17  
18  
19 The participants described that these feelings, in addition to the lack of an effective treatment,  
20 renders dementia a great burden, perceived as almost a “death sentence”. They described that the  
21 burden was caused by the loss of one’s independence, due to deterioration of cognitive skills, loss  
22 of physical capabilities, and loss of social relationships. Dementia was also regarded as a burden  
23 for the families, relatives and social relations of persons with dementia, and society.  
24  
25  
26  
27  
28  
29

30  
31  
32  
33 *“You see people with Alzheimer’s disease [...], you say let’s hope my life won’t end like that, like a*  
34 *vegetable.” (fg1, French participant)*  
35  
36

37  
38 *“[Dementia requires [providing care by relatives and institutional care. It’s an expensive disease*  
39 *[...]. We do have a heavy burden to bear.” (fg3, Finnish participant)*  
40  
41  
42  
43

44  
45 Participants generally expressed a pessimistic attitude towards prevention of dementia as opposed  
46 to CVD. However, being physically, mentally and socially active was described as a potential  
47 preventive factor.  
48  
49  
50

51  
52  
53  
54 *“If you are using your brain, then, it has to do with, uh, postponing it.” (fg3, Dutch participant)*  
55  
56  
57  
58  
59  
60

1  
2  
3 Fear was described by the participants as an encouraging factor to engage more in the prevention  
4 of dementia than of CVD.  
5  
6  
7

8 The fact that dementia shares many risk factors with CVD was not generally known or expressed  
9 by the participants. Concerning dementia, the Finnish participants' main concern was identifying  
10 the first symptoms and the right time to seek medical advice.  
11  
12  
13  
14

15  
16  
17  
18 *“There should be information on when I should go to a doctor for tests. People always say that*  
19 *you should go on time, but I don't know when is on time.” (fg1, Finnish participant)*  
20  
21  
22

23  
24 Nonetheless, the key role of genetics that they attributed to dementia was closely linked to their  
25 scepticism towards its prevention.  
26  
27  
28

29  
30  
31 *“It's a matter of wait and see. You can try to take preventive measures, but you cannot stop it*  
32 *[Dementia]. If you are born to get dementia, you will get it eventually. You can take medications*  
33 *etc., then you can maybe delay the onset of the disease, but eventually it will catch you.” (fg1,*  
34 *Dutch participant)*  
35  
36  
37  
38  
39

40  
41  
42 Dementia seems to be associated with stigma. This stigma represented a barrier to obtaining  
43 reliable information for the Finnish participants, who stated that the fear of dementia made it more  
44 difficult to talk about it compared to CVD, and to consult a doctor about it.  
45  
46  
47  
48  
49

50  
51  
52 *“The fear can make you freeze and cause you to not be able to talk. Just wondering about it in*  
53 *your mind, not putting it into words.” (fg3, Finnish participant)*  
54  
55  
56  
57  
58  
59  
60

### **The interactive process of three identified categories influencing engagement in the self-management prevention programme**

From the three categories, a core category was developed: the interactive process of the three identified categories influencing engagement in the self-management prevention programme. The three categories were interconnected through an interactive process and were strongly influenced by the local healthcare culture and context which shaped them differently (See figure 2). This interactive process is presented in figure 2. Figure 2 shows that in order to minimise the stigma, there is a need to receive relevant, reliable information, and to trust in healthcare providers. However, the burden and stigma of dementia was described as a barrier to receiving reliable information and trusting healthcare providers. The participants described that fear of dementia made it difficult to talk about it (e.g., to GP), which in turn reinforced their perception of insufficient reliable information about the disease, which made it more frightening and unsafe. It was also described that this fear was experienced more strongly for dementia compared to CVD. On the other hand, participants mentioned that the fear of dementia can improve their motivation to engage in dementia prevention programmes.

*“I realised when another person got sick, I woke up then 10 years ago when my mother was diagnosed with Alzheimer and I panicked and realised that I must do something.” (fg3, Finnish participant)*

The analyses also demonstrated that the category of burden and stigma of dementia was also interconnected with the category of trust in healthcare providers; only if participants could trust the source of information, then they were likely to take action for their engagement in a prevention programme. The participants in all three countries described how the local healthcare system and context influenced their experiences in obtaining reliable health information, trust, and also in relation to the burden and stigma of dementia. For example, Finnish participants experienced a

1  
2  
3 sense of responsibility for their health and disease prevention. They described their interest in  
4 health self-management related to specific diseases. Whereas, French and Dutch participants  
5 focused on the overall health status. The Finnish participants mostly highlighted the importance of  
6 trusting the source of information and the possibility of obtaining information independently.  
7  
8 Dutch and French participants emphasised the importance of a trustworthy relationship with  
9 healthcare providers (e.g., GPs and nurses), which led them to trust the information received.  
10  
11 Personal responsibility for their health (e.g., receiving reliable information about prevention of  
12 CVD and dementia) was important for the Finnish participants. Finnish participants described that  
13 they were habituated to independently make medical decisions, and critically question medical  
14 recommendations. In contrast, the French and Dutch participants relied more on the advice  
15 provided by their healthcare providers without questioning them. The importance and benefits of  
16 dementia prevention were more clearly acknowledged by the Finnish participants; however, Dutch  
17 participants believed more in luck and chance regarding disease prevention.

18  
19  
20  
21  
22  
23  
24  
25  
26  
27  
28  
29  
30  
31  
32  
33 *“We bicycled a lot and we liked / enjoyed doing that. But nevertheless, you can get the most*  
34 *horrible things. At the end of the day you have no influence on it.” (fg3, Dutch participant)*

## 35 36 37 38 39 40 41 **DISCUSSION**

42  
43 In this European qualitative study, the aim was to explore the attitudes of older adults at increased  
44 risk of CVD and dementia regarding engagement in eHealth self-management prevention  
45 programmes, and to describe the facilitators and barriers. Three categories were identified from  
46 the analysis: (i) *access to reliable information*, (ii) *trust in healthcare providers*, and (iii) *burden*  
47 *and stigma of dementia*. From these categories a core category was developed: *The interactive*  
48 *process of the three identified categories influencing engagement in self-management prevention*  
49 *programmes*. The three categories were interacting with each other and were influenced by the  
50 local healthcare culture and context, becoming either facilitators or barriers to engage in eHealth  
51  
52  
53  
54  
55  
56  
57  
58  
59  
60

1  
2  
3 self-management prevention programmes. This interactive process suggests that in order for  
4  
5 individuals to actively engage in the eHealth prevention programmes, there is a need for having  
6  
7 access to reliable information about prevention of CVD and dementia. Providing reliable  
8  
9 information regarding the prevention of these two conditions, from trustworthy sources, is  
10  
11 therefore regarded as an opportunity for eHealth programmes to fulfil this need. However, in order  
12  
13 to translate this information into knowledge and for it to be used by individuals who can take  
14  
15 action towards engaging in prevention programmes, individuals need to trust the information  
16  
17 provided and have a relationship of trust with their healthcare provider. The eHealth prevention  
18  
19 programmes might therefore include support from individuals' own healthcare providers, or from  
20  
21 online health coaches. The interactive process between categories stresses that trust in the  
22  
23 healthcare provider, access to reliable information and the generated knowledge could support  
24  
25 individuals and decrease their experience of stigma and burden. This interactive process can  
26  
27 encourage individuals to take action towards engaging in prevention programmes (see figure 2).  
28  
29 Previous research focusing on prevention of CVD from the perspective of nurses<sup>22, 39</sup> and of older  
30  
31 adults<sup>21, 40</sup> identified the importance of establishing a relationship of trust, managing awareness  
32  
33 and expectations (including individuals' level of knowledge), and providing personally tailored  
34  
35 support. Previous research from our research group has also stressed the importance of  
36  
37 considering the local healthcare practices to plan new forms of preventive healthcare involving the  
38  
39 individual's self-management.<sup>22</sup>

40  
41  
42 Access to reliable information was identified as a key prerequisite for individuals' engagement in  
43  
44 prevention programmes. The Internet, however, was perceived as a confusing source of health-  
45  
46 related information. The findings stress the importance of implementing prevention programmes,  
47  
48 such as eHealth self-management programmes (e.g., HATICE), administered by trustworthy  
49  
50 organisations to provide reliable information about prevention. Previous research found that  
51  
52  
53  
54  
55  
56  
57  
58  
59  
60

1  
2  
3 information from the Internet and media are a facilitator of stimulating engagement in preventive  
4 care from the perspective of healthcare providers (e.g., GPs).<sup>19</sup>  
5  
6  
7  
8  
9

10 The findings stress that trust in healthcare providers, the source of information, and the healthcare  
11 system are crucial facilitating factors. The lack of trust might hinder individuals from contacting  
12 their healthcare provider, following recommendations, receiving information, and meaningfully  
13 translating the information into practice. The participants expressed that they have limited  
14 knowledge regarding concrete methods to prevent CVD and dementia. Although dementia has  
15 been identified as a key public health priority world-wide,<sup>41</sup> knowledge about it, and its risk  
16 factors is limited in the general population.<sup>42</sup> Based on our results, the lack of knowledge about  
17 dementia among individuals might lead to fear, which hinders individuals from seeking help from  
18 the healthcare system and accessing the available opportunities for prevention, as well as a stigma,  
19 which might mirror the general attitude of the society.<sup>43</sup> Interestingly, the burden and stigma of  
20 dementia was identified both as a facilitator and a barrier for engagement in prevention. It can be  
21 assumed as a factor that might hinder individuals from contacting healthcare providers and  
22 receiving thorough information regarding the disease, including the current evidence on beneficial  
23 preventive interventions. It can also motivate them to engage in prevention and to take action.  
24 According to the literature, the concept of stigma is defined as “having some form of mark or sign  
25 that denotes disgrace or discredit”,<sup>43</sup> which refers to “marked differences from what is ‘normal’ for  
26 a group of people, and to negative emotional and/or behavioural responses to those differences”.<sup>44</sup>  
27 When discussing prevention, prognosis, and treatment of dementia, in contrast to CVD, the  
28 participants had a rather “white-and-black” perspective, which is in line with the previous  
29 literature,<sup>45</sup> describing a belief that “nothing can be done”, which impacts individuals’ wellbeing.<sup>44</sup>  
30 However, despite their pessimistic attitude regarding dementia prevention, the participants  
31 described how their fear of the disease was experienced as a factor encouraging them to actively  
32  
33  
34  
35  
36  
37  
38  
39  
40  
41  
42  
43  
44  
45  
46  
47  
48  
49  
50  
51  
52  
53  
54  
55  
56  
57  
58  
59  
60

1  
2  
3 engage in prevention programmes for dementia, compared to CVD, by being physically, mentally  
4 and socially active. Our findings regarding the dynamic interactions between the identified  
5 and socially active. Our findings regarding the dynamic interactions between the identified  
6 categories is supported by the previous literature, which highlighted the importance of education  
7 and information in reducing the fear and stigma associated with dementia.<sup>45</sup> Furthermore, the  
8 identified categories confirm previous findings on the urgent need, across all levels of society, for  
9 increased awareness and understanding of dementia (diagnosis, symptoms, treatment, risk factors  
10 and prevention), to improve the quality of life among older adults.<sup>41, 42</sup>

11  
12  
13  
14  
15  
16  
17  
18  
19  
20  
21 The results highlight not only the similar attitudes about prevention of dementia and CVD across  
22 the three countries, which emerged as the three categories on a general level, but also the  
23 variations that are grounded in the cultural and contextual backgrounds that shaped the local  
24 healthcare culture and context in these three countries. Culture is defined as the beliefs,  
25 perceptions, values, norms, customs, and behaviours that are shared by a group or society and are  
26 passed from one generation to the next through both formal and informal education.<sup>46</sup> In this  
27 study, context is intended as “social environment”, that is the pool of structures and social systems  
28 through which society is organised (e.g., the healthcare system).<sup>47</sup> Engaging participants is key to  
29 successful prevention programmes. Although previous studies<sup>19-21</sup> investigated the motivating  
30 factors to engage older adults in prevention programmes, none of these studies had an  
31 international design. This study emphasises how the local healthcare culture and context might  
32 affect individuals’ needs and access to information, their trust in healthcare providers and their  
33 perceived dementia-related stigma and burden, which represents their attitudes regarding  
34 prevention. Previous research highlights how culture and context can influence manifestations of  
35 dementia.<sup>48</sup> It also stresses the importance of culture and context in shaping several aspects of  
36 caregiving, as well as public policies, to improve the awareness and understanding of dementia.<sup>49</sup>  
37  
38  
39  
40  
41  
42  
43  
44  
45  
46  
47  
48  
49  
50  
51  
52  
53  
54  
55  
56  
57  
58 In this respect, one important difference identified in the study among the participants was that the  
59  
60



1  
2  
3 Finnish participants were more independent and described their self-responsibility when making  
4 health-related decisions, whereas the Dutch and French participants relied more on their healthcare  
5 providers. These differences were also identified in a recent qualitative study from our research  
6 group conducted with Finnish and Dutch nurses about optimally supporting patients in CVD  
7 preventive care.<sup>22</sup> The study indicated that even if aims in preventive care were very similar  
8 between Finland and the Netherlands, patient empowerment and autonomy received more  
9 attention in Finland than the Netherlands.<sup>22</sup> This is a difference to the present study which may be  
10 due to differences in the three healthcare-systems. Differences may be based on a more stable  
11 doctor-patient relationship in France and the Netherlands, as opposed to Finland, where a patient  
12 is not registered with a specific GP. Furthermore, Finland has a long history of intensive  
13 preventive programmes targeting CVD,<sup>50</sup> which made the concept of prevention well assimilated  
14 within the society. Finally, the Finnish participants were recruited within a previous preventive  
15 trial cohort.<sup>7</sup> Beishuizen and collaborators,<sup>22</sup> demonstrated that when designing and introducing  
16 new preventive healthcare applying eHealth self-management, local healthcare practices are to be  
17 considered to fulfil optimal engagement. According to the literature, these differences can be  
18 referred to as differences in organisation, their focus, accessibility, role of primary care and patient  
19 autonomy,<sup>22</sup> and national guidelines for primary and secondary prevention care<sup>10</sup>. Healthcare-  
20 related differences among the three countries were considered in the HATICE intervention  
21 design,<sup>10</sup> and these results confirm that context diversity should be considered when planning  
22 international prevention programmes. Further studies are required to identify the most effective  
23 preventive strategies across cultures.

### 53 ***Methodological considerations***

54 Although the study was conducted in small sections of each country's populations, these are  
55 representative samples of their respective areas, ensuring a fully international setting. Data  
56  
57  
58  
59  
60

1  
2  
3 collection in three different languages was challenging, as the translations into English might have  
4 influenced the results, and some of the nuances could have been lost in translation. However,  
5 interview guides were prepared with great care, including consideration of language-related issues.  
6  
7 The findings were extensively discussed within the teams, both at a national and international  
8 level. Moreover, the total number of focus groups conducted and the broad areas of expertise of  
9 the research team were a significant asset. Additionally, frequent feedback from all team members  
10 was instrumental for the good execution of the study and for the mutual understanding of the local  
11 settings. Differences in recruitment, such as the older age of the Dutch participants in the third  
12 round of focus groups and the enrolment of the Finnish participants from a previous preventive  
13 trial cohort<sup>7</sup> might have also affected our findings. In order to check the trustworthiness of the  
14 data, a summary of the conclusions of the third focus group was sent to the participants. The main  
15 reason for performing the member check in this way was that the third round of focus groups was  
16 covering all the areas of focus in the study and was complementary to the data from the first two  
17 rounds.  
18  
19  
20  
21  
22  
23  
24  
25  
26  
27  
28  
29  
30  
31  
32  
33  
34

### 35 ***Conclusions***

36  
37 The study identified three categories and a core category. The categories were interconnected  
38 through an interactive process and influenced by the local healthcare culture and context which  
39 shaped them differently, either as facilitators or barriers to engage in eHealth self-management  
40 prevention programmes. The findings can be integrated into future developments of eHealth self-  
41 management interventions to prevent modifiable risk factors for CVD and dementia. eHealth self-  
42 management programmes can fulfil the need for reliable and trustworthy health information. If a  
43 safe and trustworthy online environment can be developed, this may enhance engagement in  
44 prevention programmes and stimulate de-stigmatisation of dementia. The findings highlight the  
45 importance of taking the local healthcare culture and context into account when planning  
46 international prevention programmes. Studies on the perception of prevention and lifestyle  
47  
48  
49  
50  
51  
52  
53  
54  
55  
56  
57  
58  
59  
60

1  
2  
3 changes during and after clinical trials among individuals at risk for, or at an early stage of,  
4  
5 cognitive impairment, can provide further insights.  
6  
7

## 8 **Acknowledgments**

9  
10  
11 The authors thank all the study participants, Carin Miedema and Suzanne Ligthart, for their  
12  
13 assistance in the organisation and moderation of the Dutch focus groups; Floor Rooskens and  
14  
15 Tessa van Middelaar for their assistance in the coding and analysis of the Dutch transcripts; and  
16  
17 Shireen Sindi and Sophie Gaber for the language edition.  
18  
19

## 20 **Contributors**

21  
22  
23  
24  
25 Obtained funding: MK, ER, EMvC, HS, SA; Study design: UA, CRLB, MB, EMvC, FM, ER, HS,  
26  
27 SA, MK, JP, JG, NC, SS. Data collection: CRLB, MB, AR, LS, JG, NC, SS. Data analysis: UA,  
28  
29 CRLB, MB, EMvC, JG, SS. Interpretation of the results: UA, MF, MB, CRLB, EMvC, AR, FM,  
30  
31 NC, JP. Drafting of the manuscript: UA, MF, MB. The manuscript has been approved by all the  
32  
33 authors.  
34  
35

## 36 **Funding**

37  
38  
39  
40 The research leading to these results has received funding from the European Union Seventh  
41  
42 Framework Programme (FP7/2007-2013) under grant agreement n° 305374. The study has also  
43  
44 been funded by the Joint Programme Neurodegenerative Disease (JPND) “Multimodal preventive  
45  
46 trials for Alzheimer’s Disease: towards multinational strategies-programme: MIND-AD”,  
47  
48 Academy of Finland (291803) and VTR, Kuopio University Hospital (5772815), Swedish  
49  
50 Research Council (529-2014-7503), The Stockholms Sjukhem foundation, The Netherlands  
51  
52 Organisation for Health Research and Development, (733051041), and The French National  
53  
54 Research Agency (ANR-14-JPPS-0001-02).  
55  
56  
57  
58

59 **Competing interests:** The authors declare that they have no conflict of interest.  
60

1  
2  
3 **Patient consent for publication:** All participants gave written and oral informed consent.  
4  
5

6 **Ethical approval:** The HATICE study was approved by the medical ethics committee of the  
7  
8 Academic Medical Center in the Netherlands, the Comité de Protection des Personnes Sud Ouest  
9  
10 et Outre Mer in France, and the Northern Savo Hospital District Research Ethics Committee in  
11  
12 Finland. For the present ancillary study, no separate approval was required in Finland and France;  
13  
14 in the Netherlands, approval was required and obtained from the medical ethics committee of the  
15  
16 Academic Medical Centre.  
17  
18

19  
20  
21 **Provenance and peer review:** Not commissioned; externally peer reviewed.  
22  
23

24 **Data sharing statement:** Data will not be made publicly available. Please contact the  
25  
26 corresponding author for more information.  
27  
28

29 **Open access:** This is an open access article distributed in accordance with the Creative Commons  
30  
31 Attribution Non Commercial (CC BY-NC 4.0) license, which permits others to copy, distribute,  
32  
33 remix, adapt, build upon this work non-commercially, and license their derivative works on  
34  
35 different terms, provided the original work is properly cited, appropriate credit is given, any  
36  
37 changes made indicated, and the use is non-commercial. See:  
38  
39 <http://creativecommons.org/licenses/by-nc/4.0/>.  
40  
41  
42  
43

44 **Full list of the members of the HATICE study group:**  
45

46  
47 Sandrine Andrieu, Mariagnese Barbera, Cathrien Beishuizen, Carol Brayne, Nicola Coley, Juliette  
48  
49 Guillemont, Marieke Hoevenaar-Blom, Susan Jongstra, Miia Kivipelto, Francesca Mangialasche,  
50  
51 Yannick Meiller, Eric P Moll van Charante, Tiia Ngandu, Edo Richard, Hilikka Soininen, Bram  
52  
53 van de Groep, Willem A van Gool, Tessa van Middelaar, Lennard van Wanrooij.  
54  
55  
56  
57  
58  
59  
60

## References

1. Alzheimer's Disease International. World Alzheimer report 2015. The global impact of dementia: An analysis of prevalence, incidence, cost and trend. 2015; Available from: <https://www.alz.co.uk/research/WorldAlzheimerReport2015.pdf>.
2. Writing Group M, *et al*. Executive Summary: Heart Disease and Stroke Statistics--2016 Update: A Report From the American Heart Association. *Circulation* 2016; 133: 447-54.
3. Winblad B, Amouyel P, Andrieu S, *et al*. Defeating Alzheimer's disease and other dementias: a priority for European science and society. *Lancet Neurol* 2016; 15: 455-532.
4. Shah H, Albanese E, Duggan C, *et al*. Research priorities to reduce the global burden of dementia by 2025. *Lancet Neurol* 2016; 15: 1285-1294.
5. Smith AD, Mangialasche F, Kivipelto M. Dementia research priorities-2. *Lancet Neurol* 2017; 16:181-182.
6. Solomon A, Mangialasche F, Richard E, *et al*. Advances in the prevention of Alzheimer's disease and dementia. *J Intern Med* 2014; 275: 229-50.
7. Ngandu T, Lehtisalo J, Solomon A, *et al*. A 2 year multidomain intervention of diet, exercise, cognitive training, and vascular risk monitoring versus control to prevent cognitive decline in at-risk elderly people (FINGER): a randomised controlled trial. *Lancet* 2015; 385: 2255-63.
8. Andrieu S, Guyonnet S, Coley N, *et al*. Effect of long-term omega 3 polyunsaturated fatty acid supplementation with or without multidomain intervention on cognitive function in elderly adults with memory complaints (MAPT): a randomised, placebo-controlled trial. *Lancet Neurol* 2017; 16: 377-389.
9. Moll van Charante EP, Richard E, Eurelings LS, *et al*. Effectiveness of a 6-year multidomain vascular care intervention to prevent dementia (preDIVA): a cluster-randomised controlled trial. *Lancet* 2016; 388: 797-805.

10. Barbera M, Mangialasche F, Jongstra S, *et al.* Designing an Internet-Based Multidomain Intervention for the Prevention of Cardiovascular Disease and Cognitive Impairment in Older Adults: The HATICE Trial. *J Alzheimers Dis* 2018; 62: 649-663.
11. Beishuizen CR, Stephan BC, van Gool WA, *et al.* Web-Based Interventions Targeting Cardiovascular Risk Factors in Middle-Aged and Older People: A Systematic Review and Meta-Analysis. *J Med Internet Res* 2016; 18: e55.
12. Neubeck L, Ascanio R, Bauman A, *et al.* Planning locally relevant Internet programs for secondary prevention of cardiovascular disease. *Eur J Cardiovasc Nurs* 2011; 10: 213-20.
13. O'Connor S, Hanlon P, O'Donnell CA, *et al.* Understanding factors affecting patient and public engagement and recruitment to digital health interventions: a systematic review of qualitative studies. *BMC Med Inform Decis Ma* 2016; 16: 120.
14. Andrieu S, Coley N, Gardette V, *et al.* Representations and practices of prevention in elderly populations: investigating acceptance to participate in and adherence to an intervention study for the prevention of Alzheimer's disease (ACCEPT study)--the need for a multidisciplinary approach. *J Nutr Health Aging* 2012; 16: 352-4.
15. Coley N, Rosenberg A, van Middelaar T, *et al.* Older Adults' Reasons for Participating in an eHealth Prevention Trial: A Cross-Country, Mixed-Methods Comparison. *J Am Med Dir Assoc* 2019; 20: 843-49.
16. World Health Organization. Adherence to long-term therapies: Evidence for action. 2003.
17. Kickbush I, Maag D. Health literacy, in *International encyclopedia of public health*, K. Heggenhougen and S. Quah, Editors. 2008, Academic Press: San Diego. p. 204-211.
18. Fearn P, Avenell, A, Mccann S, *et al.* Factors influencing the participation of older people in clinical trials - data analysis from the MAVIS trial. *J Nutr Health Aging* 2010; 14: 51-6.

- 1  
2  
3 19. Walter U, Flick U, Neuber A, *et al.* Putting prevention into practice: qualitative study of  
4 factors that inhibit and promote preventive care by general practitioners, with a focus on elderly  
5 patients. *BMC Fam Pract* 2010; 11: 68.  
6  
7  
8  
9  
10 20. Laditka SB, Corwin SJ, Laditka JN, *et al.* Attitudes about aging well among a diverse group of  
11 older Americans: implications for promoting cognitive health. *Gerontologist* 2009; 49 Suppl 1:  
12 S30-9.  
13  
14  
15  
16  
17 21. Ligthart SA, van den Eerenbeemt KD, Pols J, *et al.* Perspectives of older people engaging in  
18 nurse-led cardiovascular prevention programmes: a qualitative study in primary care in the  
19 Netherlands. *Br J Gen Pract* 2015; 65: e41-8.  
20  
21  
22  
23  
24 22. Beishuizen CRL, Akenine U, Barbera M, *et al.* Integrating nurses' experiences with supporting  
25 behaviour change for cardiovascular prevention into a self-management internet-platform in  
26 Finland and Netherlands: a qualitative study. *BMJ Open* 2019; 9: e023480.  
27  
28  
29  
30  
31 23. Bodenheimer T, Lorig K, Holman H, *et al.* Patient self-management of chronic disease in  
32 primary care. *JAMA* 2002; 288: 2469-75.  
33  
34  
35  
36 24. Lorig KR, Holman H. Self-management education: history, definition, outcomes, and  
37 mechanisms. *Ann Behav Med* 2003; 26: 1-7.  
38  
39  
40  
41 25. Griffiths F, Lindenmeyer A, Powell J, *et al.* Why are health care interventions delivered over  
42 the internet? A systematic review of the published literature. *J Med Internet Res* 2006; 8: e10.  
43  
44  
45 26. Bennett GG, Glasgow RE. The delivery of public health interventions via the Internet:  
46 actualizing their potential. *Annu Rev Public Health* 2009; 30: 273-92.  
47  
48  
49 27. Sorensen K, Pelikan JM, Rothlin F, *et al.* Health literacy in Europe: comparative results of the  
50 European health literacy survey (HLS-EU). *Eur J Public Health* 2015; 25: 1053-8.  
51  
52  
53 28. Richard E, Jongstra S, Soininen H, *et al.* Healthy Ageing Through Internet Counselling in the  
54 Elderly: the HATICE randomised controlled trial for the prevention of cardiovascular disease and  
55 cognitive impairment. *BMJ Open* 2016; 6: e010806.  
56  
57  
58  
59  
60

- 1  
2  
3 29. Jongstra S, Beishuizen C, Andrieu S, *et al.* Development and Validation of an Interactive  
4  
5 Internet Platform for Older People: The Healthy Ageing Through Internet Counselling in the  
6  
7 Elderly Study. *Telemed J E Health* 2017; 23: 96-104.  
8  
9  
10 30. Corbin J, Strauss A. *Basics of qualitative research: Techniques and procedures for developing*  
11  
12 *grounded theory*, ed. 3rd. 2008, Thousand oaks, California: SAGE publications.  
13  
14  
15 31. Healthy Aging Through Internet Counselling in the Elderly (HATICE). Collaborative project  
16  
17 co-funded by the European Unions' Seventh framework programme (FP7, 2007-2013) under  
18  
19 grant agreement No 305374. Last updated nov 2018; Available from: <http://www.hatice.eu/>.  
20  
21  
22 32. Tong A, Sainsbury P, Craig G. Consolidated criteria for reporting qualitative research  
23  
24 (COREQ): a 32-item checklist for interviews and focus groups. *Int J Qual Health Care* 2007; 19:  
25  
26 349-57.  
27  
28  
29 33. Vuorenkoski L. Restructuring municipalities and municipal health services in Finland.  
30  
31 *Eurohealth* 2007; 13: 8-10.  
32  
33  
34 34. Vuorenkoski L. Finland Health system review. *Health Systems in Transition* 2008; 10:  
35  
36 Available from: [http://www.euro.who.int/\\_data/assets/pdf\\_file/0007/80692/E91937.pdf](http://www.euro.who.int/_data/assets/pdf_file/0007/80692/E91937.pdf).  
37  
38  
39 35. Thomson S, Osborn R, Squires D. International Profiles of Health Care Systems, 2102, The  
40  
41 Commonwealth Fund. 2012; Available from:  
42  
43 [https://www.commonwealthfund.org/sites/default/files/documents/media\\_files\\_publications\\_fund\\_report\\_2012\\_nov\\_1645\\_squires\\_intl\\_profiles\\_hlt\\_care\\_systems\\_2012.pdf](https://www.commonwealthfund.org/sites/default/files/documents/media_files_publications_fund_report_2012_nov_1645_squires_intl_profiles_hlt_care_systems_2012.pdf).  
44  
45  
46  
47 36. Delamaire M, Lafortune G. Nurses in Advanced Roles: A Description and Evaluation of  
48  
49 Experiences in 12 Developed Countries. *OECD Health Working Papers* 2010; 54.  
50  
51  
52 37. Braspenning JCC, Schellevis FG, Grol RPTM. Tweede nationale studie naar ziekten en  
53  
54 verrichtingen in the huisartspraktijk: kwaliteithuisartsenzorg belicht. 2004, Utrecht/Nijmegen:  
55  
56 NIVEL/Centre for Quality of Care Research (WOK).  
57  
58  
59  
60



- 1  
2  
3 38. Krueger RA, Casey MA. *Focus groups: A practical guide for applied research*. ed. 5th. 2014,  
4  
5  
6  
7  
8  
9  
10  
11  
12  
13  
14  
15  
16  
17  
18  
19  
20  
21  
22  
23  
24  
25  
26  
27  
28  
29  
30  
31  
32  
33  
34  
35  
36  
37  
38  
39  
40  
41  
42  
43  
44  
45  
46  
47  
48  
49  
50  
51  
52  
53  
54  
55  
56  
57  
58  
59  
60
38. Krueger RA, Casey MA. *Focus groups: A practical guide for applied research*. ed. 5th. 2014, Thousand Oaks, CA: SAGE.
39. Brobeck E, Bergh H, Odencrants S, et al. Primary healthcare nurses' experiences with motivational interviewing in health promotion practice. *J Clin Nurs* 2011; 20: 3322-30.
40. Loon MS, van Dijk-de Vries A, van der Weijden T, et al. Ethical issues in cardiovascular risk management: Patients need nurses' support. *Nurs Ethics* 2014; 21: 540-53.
41. World health organization and Alzheimer's disease international, Dementia: A public health priority. 2012, Geneva: World Health Organization.
42. Alzheimer's society. Public awareness of dementia: what every commissioner needs to know. London. 2009.
43. Alzheimer's society. Dementia out of shadows. 2008; Available from: [www.alzheimers.org.uk/site/scripts/](http://www.alzheimers.org.uk/site/scripts/).
44. Alzheimer's Disease International. World Alzheimer Report 2019: Attitudes to dementia. 2019; Available from: <https://www.alz.co.uk/research/WorldAlzheimerReport2019.pdf>.
45. Clare L, Goater T, Woods B. Illness representations in early-stage dementia: a preliminary investigation. *Int J Geriatr Psychiatry* 2006; 21: 761-7.
46. Kielhofner G. *A Model of Human Occupation: Theory and Application*. ed. 3rd. 2008, Baltimore: Williams and Wilkins.
47. Barnett E, Casper M. A definition of "social environment". *Am J Public Health* 2001; 91: 465.
48. Alladi S, Hachinski V. World dementia: One approach does not fit all. *Neurology* 2018; 91: 264-270.
49. Kenigsberg PA, Aquino JP, Berard A, et al. Dementia beyond 2025: Knowledge and uncertainties. *Dementia (London)* 2016; 15: 6-21.

1  
2  
3 50. Puska P, Salonen JT, Nissinen A, *et al.* Changes in coronary risk factors during comprehensive  
4 five-year community programme to control cardiovascular diseases (North Karelia project). *Br*  
5  
6  
7  
8 *Med J* 1979; 2: 1173-8.  
9  
10  
11  
12  
13  
14  
15  
16  
17  
18  
19  
20  
21  
22  
23  
24  
25  
26  
27  
28  
29  
30  
31  
32  
33  
34  
35  
36  
37  
38  
39  
40  
41  
42  
43  
44  
45  
46  
47  
48  
49  
50  
51  
52  
53  
54  
55  
56  
57  
58  
59  
60

For peer review only

**Table 1** Summary demographics of the participants.

| Country                                                    | Finland |   |     | France |      | The Netherlands |      |      |
|------------------------------------------------------------|---------|---|-----|--------|------|-----------------|------|------|
|                                                            | 1       | 2 | 3   | 1      | 2    | 1               | 2    | 3    |
| Focus Group session                                        | 1       | 2 | 3   | 1      | 2    | 1               | 2    | 3    |
| nr                                                         | 9       | 9 | 10  | 9      | 7*   | 10              | 5*   | 6    |
| Average Age, Mean                                          | 70.4    |   | 66  | 72.3   | 71.1 | 69.0            | 69.2 | 83.7 |
| Gender, n (Female/Male)                                    | 3/6     |   | 8/2 | 3/6    | 2/5  | 4/6             | 2/3  | 3/3  |
| Participants with at least a secondary education degree, n | 4       |   | 3   | 8      | 6    | 6               | 4    | 6    |
| Participants with a history of CVD, n                      | 3       |   | 2   | 4      | 3    | 2               | 2    | 2    |
| Internet literate participants                             | 9       |   | na  | 9      | 7    | 10              | 5    | 6    |

N, number; CVD, Cardiovascular disease; na, not asked

\*The participants of these focus groups are a subset of the participants who attended the previous session

**Table 2** Summary of focus group interview guide including main topics and sub-topics

---

|                                                                                 |
|---------------------------------------------------------------------------------|
| <b>Focus Group Round 1</b>                                                      |
| <b>Prevention of CVD and Dementia</b>                                           |
| Knowledge about prevention                                                      |
| Role of prevention in the development of CVD and dementia                       |
| <b>Internet use</b>                                                             |
| Participants' use and attitude towards the Internet                             |
| Requirements for a user-friendly website                                        |
| Preventive programmes delivered through the Internet                            |
| <b>Relationship with the healthcare provider</b>                                |
| Important factors to receive good guidance by the healthcare provider           |
| Important factors to establish a good relationship with the healthcare provider |

---

|                                                                             |
|-----------------------------------------------------------------------------|
| <b>Focus group Round 2</b>                                                  |
| <b>Layout of the HATICE platform*</b>                                       |
| Suggestion to make the layout more user friendly                            |
| Feedback on the monitoring functionalities                                  |
| <b>Role of the coach in the HATICE intervention</b>                         |
| Preferred mode of communication and frequency of contacts                   |
| Right for the coach to access the participants' information on the platform |
| Role of the coach in the goal setting process                               |
| <b>Peer support in the HATICE platform</b>                                  |
| Attitude towards a peer Internet forum                                      |
| <b>Self-support in the HATICE intervention</b>                              |
| Information about CVD and dementia required on the platform                 |
| What type of news items / newsletter the participants will be interested in |
| Digital rewards automatic reminders and comparison with peers as motivators |

---

|                                                                                                   |
|---------------------------------------------------------------------------------------------------|
| <b>Focus Group Round 3</b>                                                                        |
| <b>Prevention</b>                                                                                 |
| What prevention is, when it should start, who benefits, importance of genetic predisposition      |
| Can CVD be prevented? How? Risk factors, barriers and motivators                                  |
| Can dementia be prevented? How? Risk factors, barriers and motivators                             |
| Comparison between CVD and dementia and their prevention                                          |
| <b>Motivation for prevention</b>                                                                  |
| Motivating factors to act upon for prevention                                                     |
| Barriers to act upon for prevention                                                               |
| How the differences between CVD and dementia affect motivation for prevention                     |
| How the differences between CVD and dementia affect the relationship with the healthcare provider |
| Different attitudes of individuals and society to dementia, compared to CVD                       |
| The role of fear                                                                                  |

---

CVD, Cardiovascular disease

\*The platform had not been yet finalised at the time of the second round of focus groups, therefore a preliminary version was shown

1  
2  
3 **Figure 1** Different stages of data collection and analysis.  
4  
5  
6

7  
8 **Figure 2** Presentation of the core category and interactions between categories  
9  
10  
11  
12  
13  
14  
15  
16  
17  
18  
19  
20  
21  
22  
23  
24  
25  
26  
27  
28  
29  
30  
31  
32  
33  
34  
35  
36  
37  
38  
39  
40  
41  
42  
43  
44  
45  
46  
47  
48  
49  
50  
51  
52  
53  
54  
55  
56  
57  
58  
59  
60

For peer review only

1  
2  
3  
4  
5  
6  
7  
8  
9  
10  
11  
12  
13  
14  
15  
16  
17  
18  
19  
20  
21  
22  
23  
24  
25  
26  
27  
28  
29  
30  
31  
32  
33  
34  
35  
36  
37  
38  
39  
40  
41  
42  
43  
44  
45  
46  
47  
48  
49  
50  
51  
52  
53  
54  
55  
56  
57  
58  
59  
60

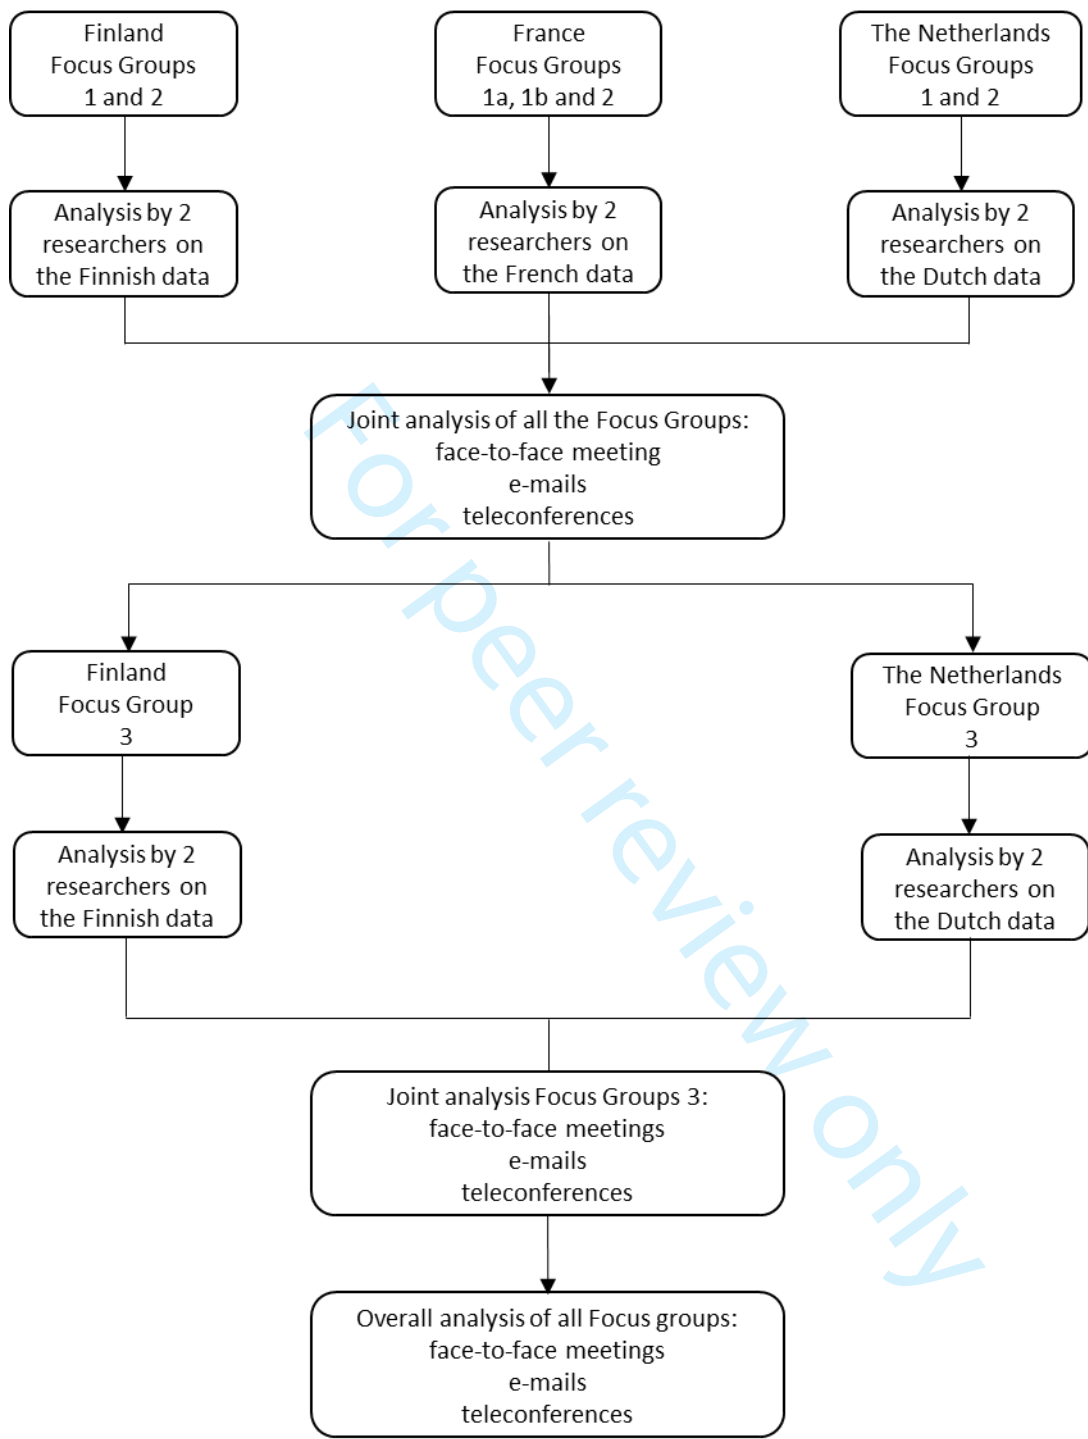

The interactive process of the three categories influencing the engagement in self management prevention programme

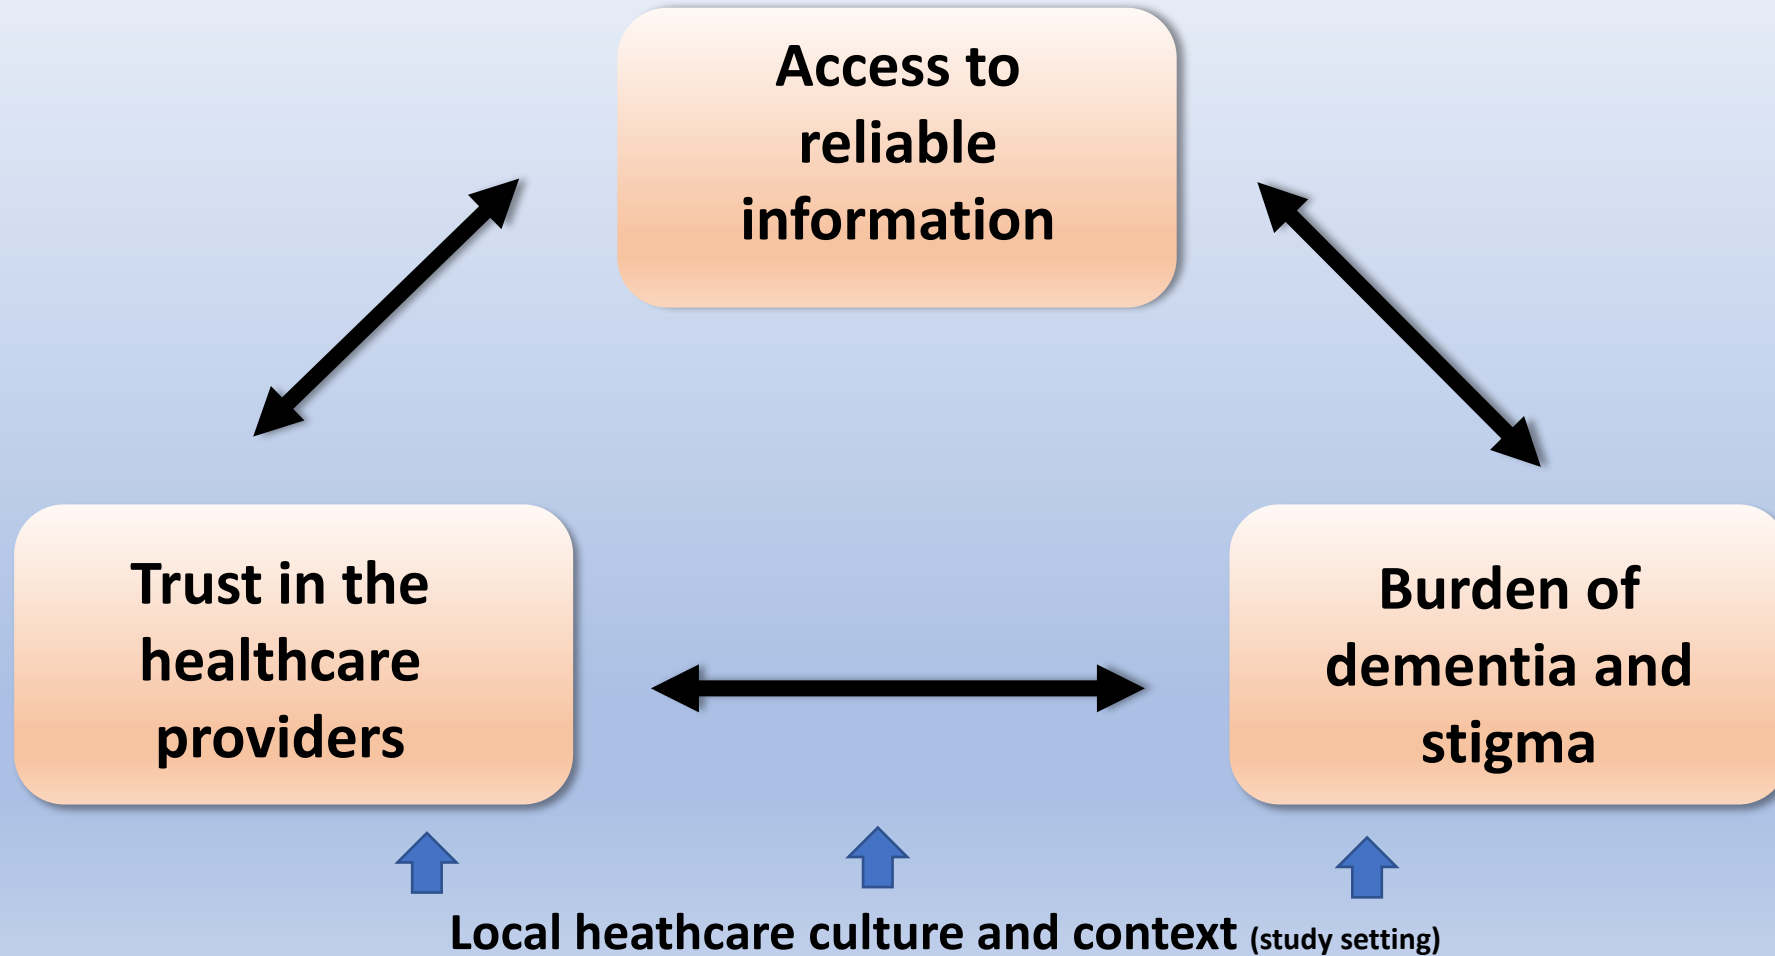

1  
2  
3  
4  
5  
6  
7  
8  
9  
10  
11  
12  
13  
14  
15  
16  
17  
18  
19  
20  
21  
22  
23  
24  
25  
26  
27  
28  
29  
30  
31  
32  
33  
34  
35  
36  
37  
38  
39  
40  
41

## COREQ (COnsolidated criteria for REporting Qualitative research) Checklist

A checklist of items that should be included in reports of qualitative research. You must report the page number in your manuscript where you consider each of the items listed in this checklist. If you have not included this information, either revise your manuscript accordingly before submitting or note N/A.

| Topic                                          | Item No. | Guide Questions/Description                                                                                                                              | Reported on Page No. |
|------------------------------------------------|----------|----------------------------------------------------------------------------------------------------------------------------------------------------------|----------------------|
| <b>Domain 1: Research team and reflexivity</b> |          |                                                                                                                                                          |                      |
| <i>Personal characteristics</i>                |          |                                                                                                                                                          |                      |
| Interviewer/facilitator                        | 1        | Which author/s conducted the interview or focus group?                                                                                                   |                      |
| Credentials                                    | 2        | What were the researcher's credentials? E.g. PhD, MD                                                                                                     |                      |
| Occupation                                     | 3        | What was their occupation at the time of the study?                                                                                                      |                      |
| Gender                                         | 4        | Was the researcher male or female?                                                                                                                       |                      |
| Experience and training                        | 5        | What experience or training did the researcher have?                                                                                                     |                      |
| <i>Relationship with participants</i>          |          |                                                                                                                                                          |                      |
| Relationship established                       | 6        | Was a relationship established prior to study commencement?                                                                                              |                      |
| Participant knowledge of the interviewer       | 7        | What did the participants know about the researcher? e.g. personal goals, reasons for doing the research                                                 |                      |
| Interviewer characteristics                    | 8        | What characteristics were reported about the interviewer/facilitator? e.g. Bias, assumptions, reasons and interests in the research topic                |                      |
| <b>Domain 2: Study design</b>                  |          |                                                                                                                                                          |                      |
| <i>Theoretical framework</i>                   |          |                                                                                                                                                          |                      |
| Methodological orientation and Theory          | 9        | What methodological orientation was stated to underpin the study? e.g. grounded theory, discourse analysis, ethnography, phenomenology, content analysis |                      |
| <i>Participant selection</i>                   |          |                                                                                                                                                          |                      |
| Sampling                                       | 10       | How were participants selected? e.g. purposive, convenience, consecutive, snowball                                                                       |                      |
| Method of approach                             | 11       | How were participants approached? e.g. face-to-face, telephone, mail, email                                                                              |                      |
| Sample size                                    | 12       | How many participants were in the study?                                                                                                                 |                      |
| Non-participation                              | 13       | How many people refused to participate or dropped out? Reasons?                                                                                          |                      |
| <i>Setting</i>                                 |          |                                                                                                                                                          |                      |
| Setting of data collection                     | 14       | Where was the data collected? e.g. home, clinic, workplace                                                                                               |                      |
| Presence of non-participants                   | 15       | Was anyone else present besides the participants and researchers?                                                                                        |                      |
| Description of sample                          | 16       | What are the important characteristics of the sample? e.g. demographic data, date                                                                        |                      |
| <i>Data collection</i>                         |          |                                                                                                                                                          |                      |
| Interview guide                                | 17       | Were questions, prompts, guides provided by the authors? Was it pilot tested?                                                                            |                      |
| Repeat interviews                              | 18       | Were repeat interviews carried out? If yes, how many?                                                                                                    |                      |
| Audio/visual recording                         | 19       | Did the research use audio or visual recording to collect the data?                                                                                      |                      |
| Field notes                                    | 20       | Were field notes made during and/or after the interview or focus group?                                                                                  |                      |
| Duration                                       | 21       | What was the duration of the interviews or focus group?                                                                                                  |                      |
| Data saturation                                | 22       | Was data saturation discussed?                                                                                                                           |                      |
| Transcripts returned                           | 23       | Were transcripts returned to participants for comment and/or                                                                                             |                      |



| Topic                                  | Item No. | Guide Questions/Description                                                                                                        | Reported on Page No. |
|----------------------------------------|----------|------------------------------------------------------------------------------------------------------------------------------------|----------------------|
|                                        |          | correction?                                                                                                                        |                      |
| <b>Domain 3: analysis and findings</b> |          |                                                                                                                                    |                      |
| <i>Data analysis</i>                   |          |                                                                                                                                    |                      |
| Number of data coders                  | 24       | How many data coders coded the data?                                                                                               |                      |
| Description of the coding tree         | 25       | Did authors provide a description of the coding tree?                                                                              |                      |
| Derivation of themes                   | 26       | Were themes identified in advance or derived from the data?                                                                        |                      |
| Software                               | 27       | What software, if applicable, was used to manage the data?                                                                         |                      |
| Participant checking                   | 28       | Did participants provide feedback on the findings?                                                                                 |                      |
| <i>Reporting</i>                       |          |                                                                                                                                    |                      |
| Quotations presented                   | 29       | Were participant quotations presented to illustrate the themes/findings?<br>Was each quotation identified? e.g. participant number |                      |
| Data and findings consistent           | 30       | Was there consistency between the data presented and the findings?                                                                 |                      |
| Clarity of major themes                | 31       | Were major themes clearly presented in the findings?                                                                               |                      |
| Clarity of minor themes                | 32       | Is there a description of diverse cases or discussion of minor themes?                                                             |                      |

Developed from: Tong A, Sainsbury P, Craig J. Consolidated criteria for reporting qualitative research (COREQ): a 32-item checklist for interviews and focus groups. *International Journal for Quality in Health Care*. 2007. Volume 19, Number 6: pp. 349 – 357

**Once you have completed this checklist, please save a copy and upload it as part of your submission. DO NOT include this checklist as part of the main manuscript document. It must be uploaded as a separate file.**
